# Supplementary material for: Mitochondrial Damage‐Induced Innate Immune Activation in Vascular Smooth Muscle Cells Promotes Chronic Kidney Disease‐Associated Plaque Vulnerability
Source: PubMed Central journal article supplement (PMC7927614; doi:10.1002/advs.202002738), 2021-01-06
Supplement: ADVS-8-2002738-s001.pdf [file ADVS-8-2002738-s001.pdf]

© 2020 Wiley-VCH GmbH

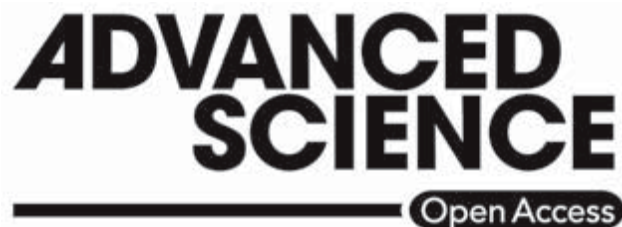

## Supporting Information

for *Adv. Sci.*, DOI: 10.1002/advs.202002738

Mitochondrial damage-induced innate immune activation in vascular smooth muscle cells promotes CKD-associated plaque vulnerability

*Xianjin Bi, Changhong Du, Xinmiao Wang, Xue-Yue Wang, Wenhao Han, Yue Wang, Yu Qiao, Yingguo Zhu, Li Ran, Yong Liu, Jiachuan Xiong, Yinghui Huang, Mingying Liu, Chi Liu, Chunyu Zeng, Junping Wang, Ke Yang\* and Jinghong Zhao\**

## Supplementary Information

### **Mitochondrial damage-induced innate immune activation in vascular smooth muscle cells promotes CKD-associated plaque vulnerability**

*Xianjin Bi, Changhong Du, Xinmiao Wang, Xue-Yue Wang, Wenhao Han, Yue Wang, Yu Qiao, Yingguo Zhu, Li Ran, Yong Liu, Jiachuan Xiong, Yinghui Huang, Mingying Liu, Chi Liu, Chunyu Zeng, Junping Wang, Ke Yang\* and Jinghong Zhao\**

#### **This file includes:**

Supplementary Figure S1 to S13

Table S1 to S7

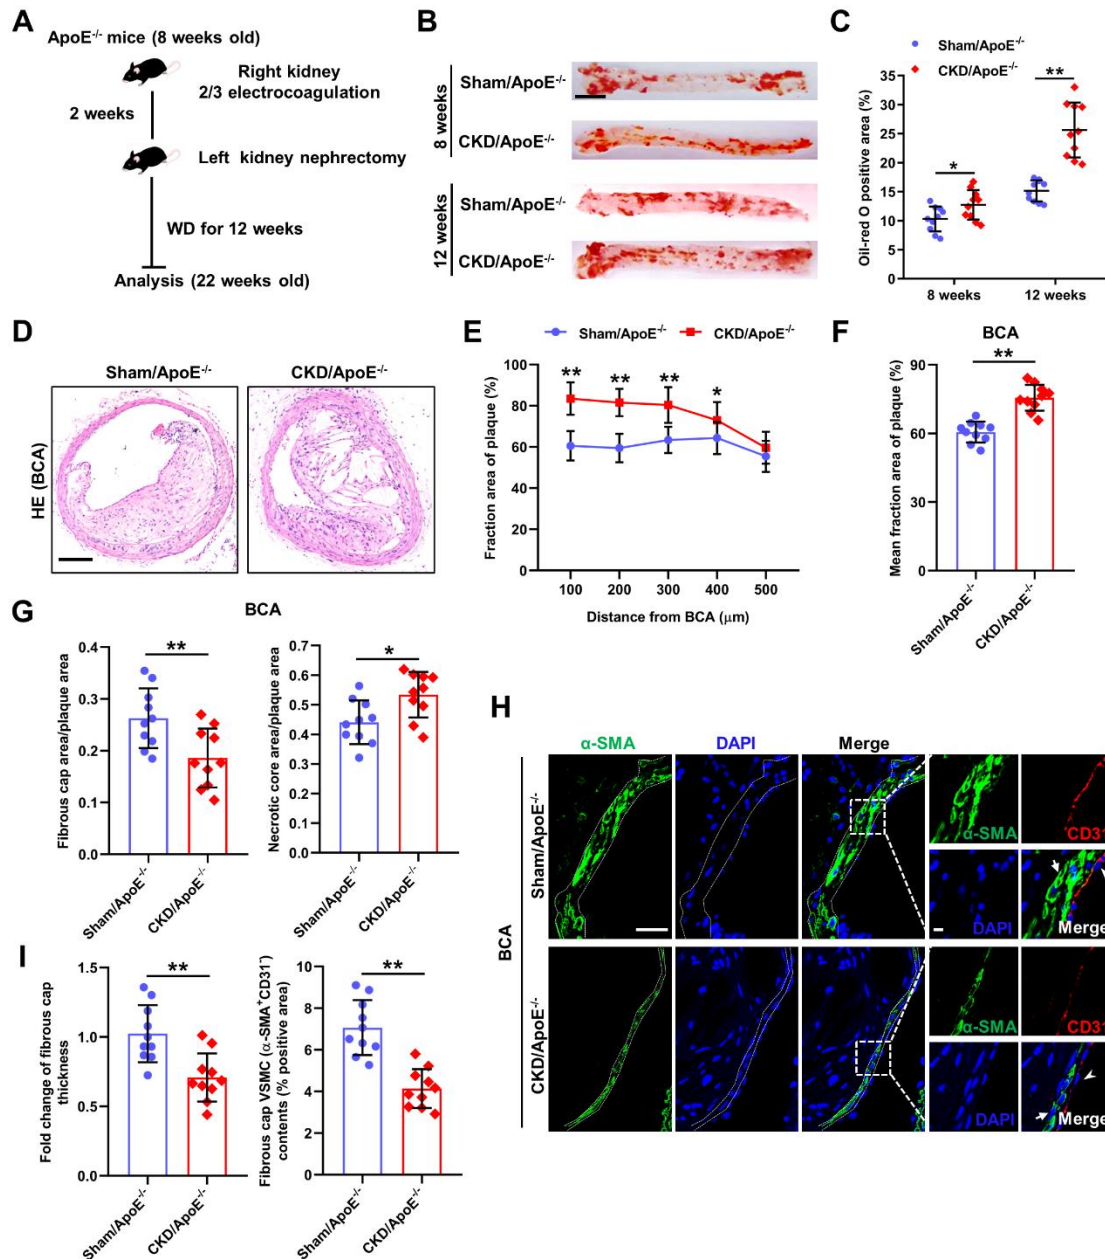

**Figure S1. CKD/ApoE<sup>-/-</sup> mouse is a useful model for investigating the pathogenesis of plaque vulnerability.** A) Scheme for CKD mouse model creation. B,C) Representative images and quantification of oil-red O staining in aortas of Sham/ApoE<sup>-/-</sup> and CKD/ApoE<sup>-/-</sup> mice after 8 and 12 weeks of WD ( $n = 10$ ). Scale bar, 5 mm. D,E) Representative HE staining and the fraction area of multiple sections in BCA plaques of Sham/ApoE<sup>-/-</sup> and CKD/ApoE<sup>-/-</sup> mice ( $n = 10$ ). Scale bar, 100  $\mu\text{m}$ . F) Mean fraction area of BCA plaques in Sham/ApoE<sup>-/-</sup> and CKD/ApoE<sup>-/-</sup> mice ( $n = 10$ ). G) Relative areas of fibrous cap and necrotic core in BCA plaques of Sham/ApoE<sup>-/-</sup> and CKD/ApoE<sup>-/-</sup> mice ( $n = 10$ ). H,I) Representative images of  $\alpha$ -SMA and CD31 staining in BCA plaques and the fold change of fibrous cap thickness and fibrous cap VSMC ( $\alpha$ -SMA<sup>+</sup>CD31<sup>-</sup>) contents in BCA plaques of Sham/ApoE<sup>-/-</sup> and CKD/ApoE<sup>-/-</sup> mice ( $n = 10$ ). The dashed lines delineate the fibrous cap area. The box indicates the region magnified in the right panels. The arrowhead indicates endothelial cells ( $\alpha$ -SMA<sup>-</sup>CD31<sup>+</sup>). Scale bar ( $\alpha$ -SMA staining), 40  $\mu\text{m}$ . Scale bar ( $\alpha$ -SMA and CD31 double staining), 10  $\mu\text{m}$ . Data represent mean  $\pm$  SD. \* $P < 0.05$ , \*\* $P < 0.01$ , two-tailed Student's  $t$ -test.

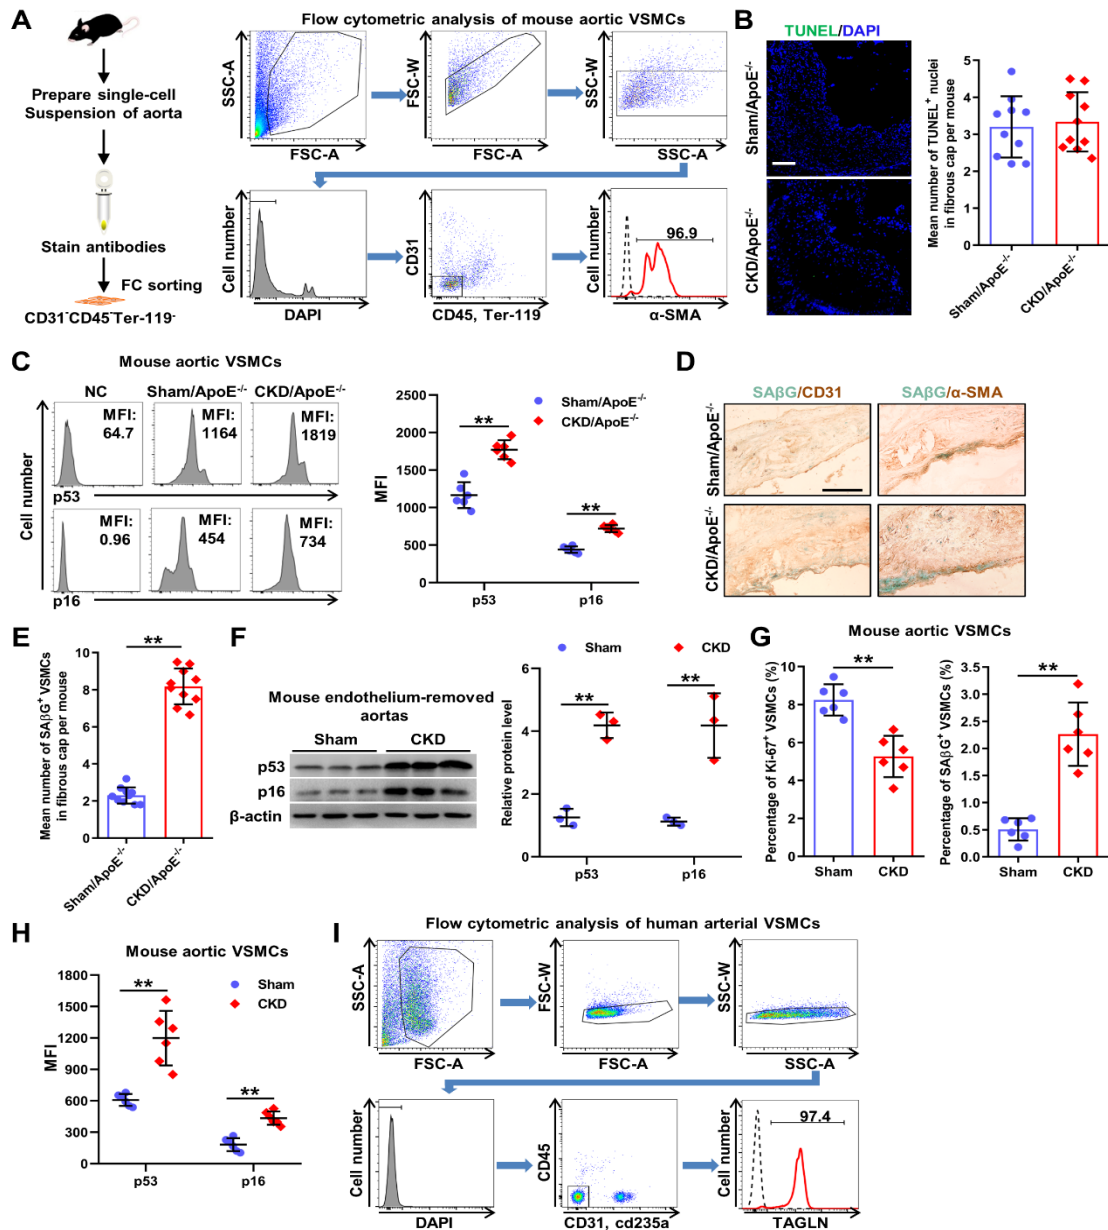

**Figure S2. CKD promotes VSMC premature senescence in vivo.** A) Scheme for the preparation of single-cell suspension of aorta (left panel) and representative FC isolation and identification of mouse aortic VSMCs (right panels). B) Representative images and quantification of terminal deoxyribonucleotidyl transferase-mediated dUTP-digoxigenin nick end labeling (TUNEL) staining in aortic root plaques of Sham/ApoE<sup>-/-</sup> and CKD/ApoE<sup>-/-</sup> mice (*n* = 10 mice). Scale bar, 200 μm. C) Representative FC analysis, as well as the MFIs of p53 and p16 in aortic VSMCs of Sham/ApoE<sup>-/-</sup> and CKD/ApoE<sup>-/-</sup> mice (*n* = 6). D) Representative images of CD31/α-SMA and SAβG double staining in aortic root plaques of Sham/ApoE<sup>-/-</sup> and CKD/ApoE<sup>-/-</sup> mice. These panels show that most of SAβG<sup>+</sup> cells are beneath the endothelial lining. Scale bar, 100 μm. E) Mean number of SAβG<sup>+</sup> VSMCs in the fibrous cap of aortic root plaques in Sham/ApoE<sup>-/-</sup> and CKD/ApoE<sup>-/-</sup> mice (*n* = 10 mice). F) WB analysis of p53 and p16 expression levels in endothelium-removed aortas of Sham and CKD mice (*n* = 3). G,H) The percentages of Ki-67<sup>+</sup> and SAβG<sup>+</sup> VSMCs, as well as the MFIs of p53 and p16 in aortic VSMCs of Sham and CKD mice (*n* = 6). I) Representative FC isolation and identification of human arterial VSMCs. Data represent mean ± SD. \*\**P* < 0.01, two-tailed Student's *t*-test.

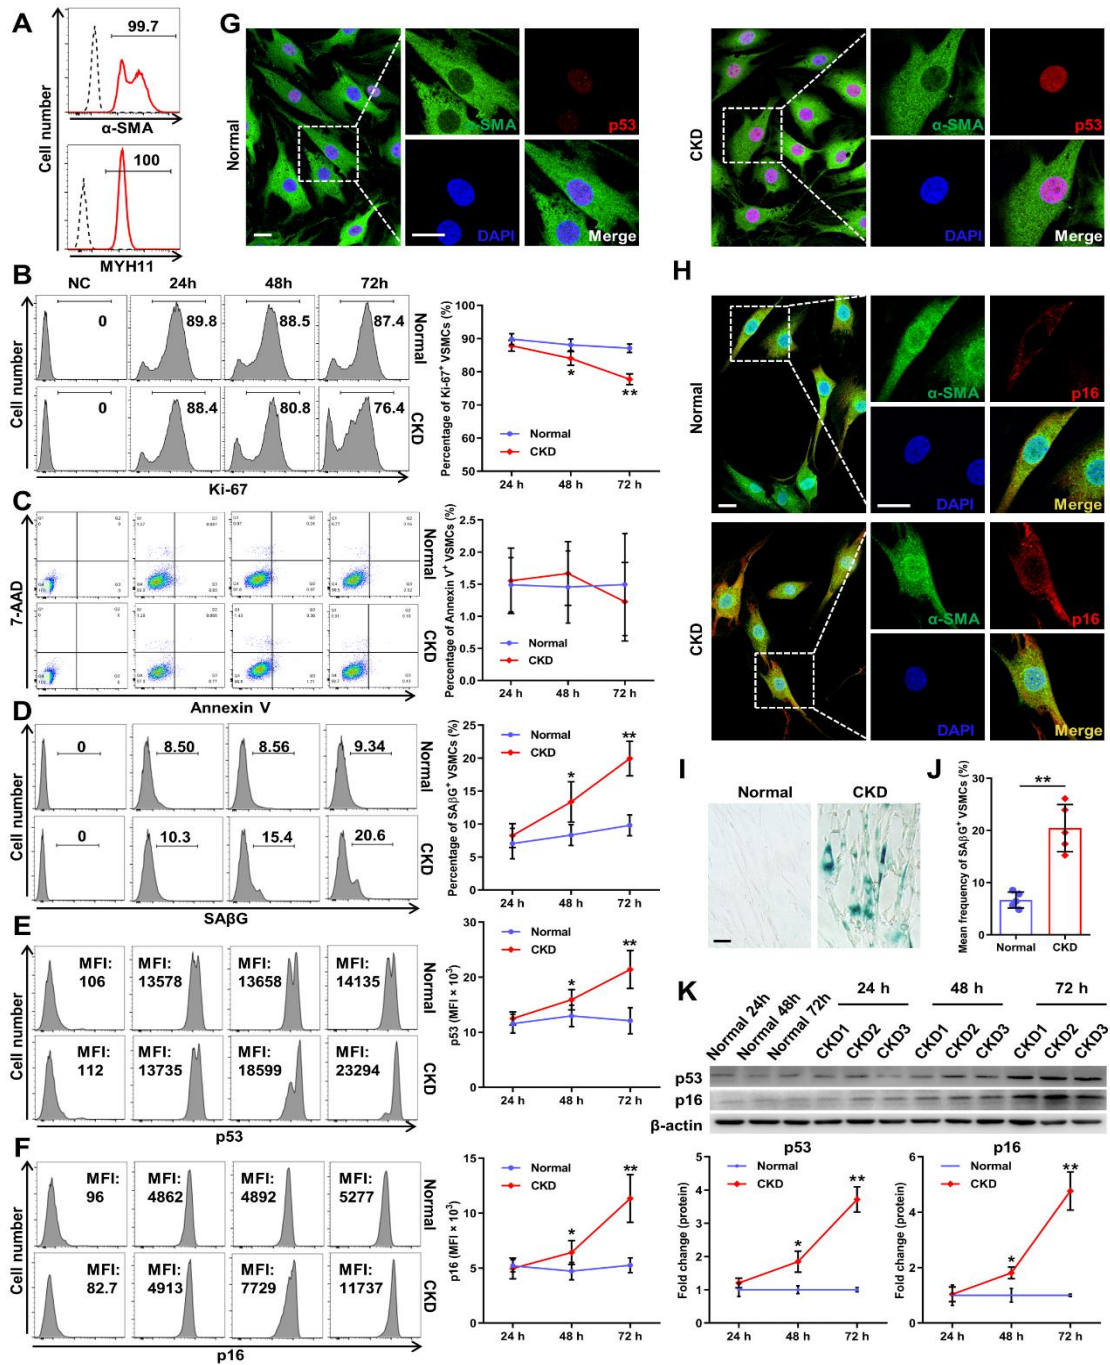



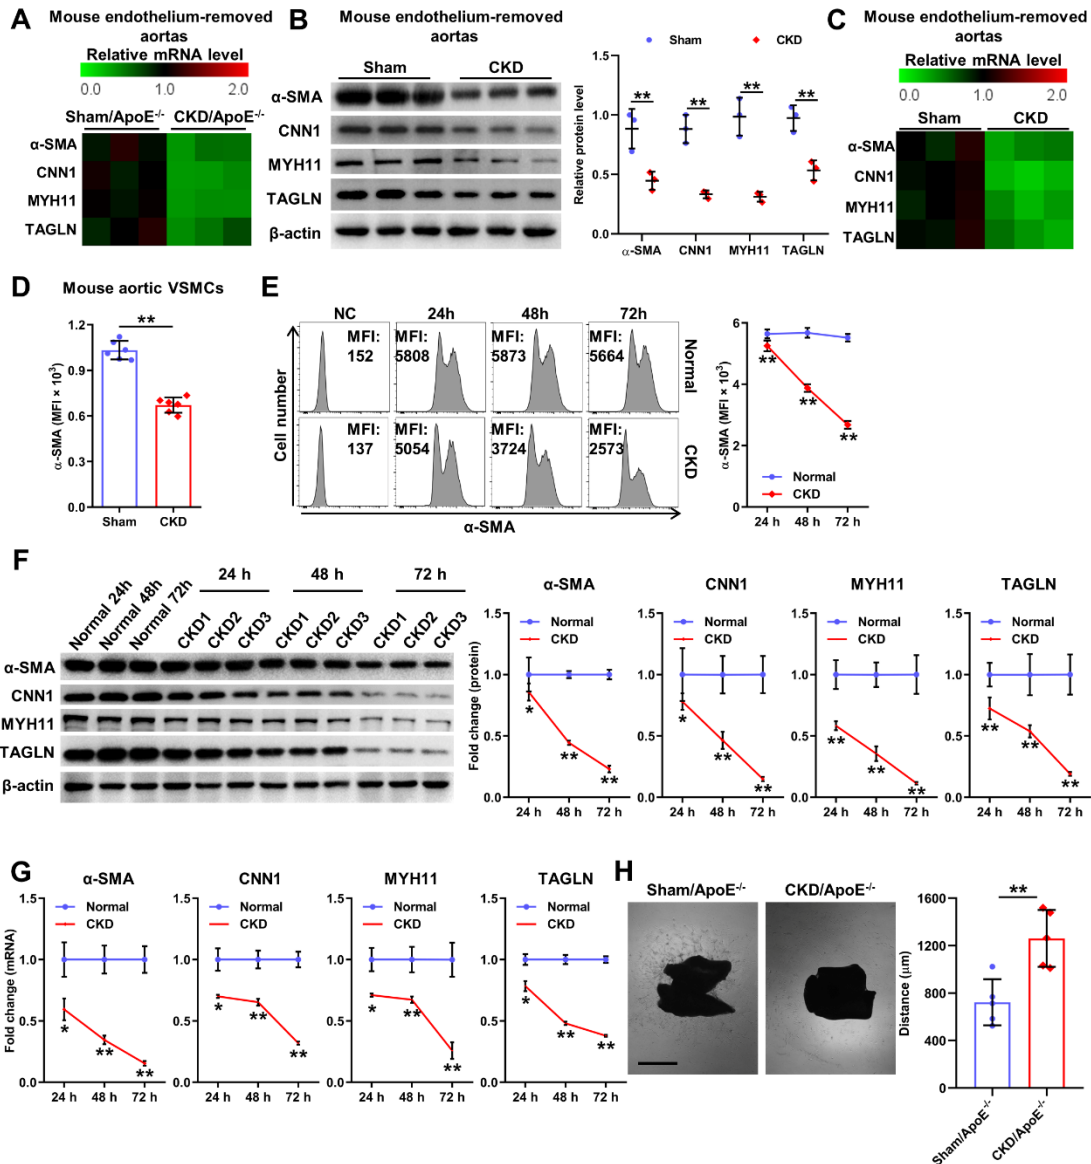

**Figure S4. CKD promotes VSMC phenotypic switching both in vivo and in vitro.**

A) Relative mRNA expression levels of  $\alpha$ -SMA, CNN1, MYH11 and TAGLN in endothelium-removed aortas of Sham/ApoE<sup>-/-</sup> and CKD/ApoE<sup>-/-</sup> mice. B) WB analysis of  $\alpha$ -SMA, CNN1, MYH11 and TAGLN expression levels in endothelium-removed aortas of Sham and CKD mice ( $n = 3$ ). C) Relative mRNA expression levels of  $\alpha$ -SMA, CNN1, MYH11 and TAGLN in endothelium-removed aortas of Sham and CKD mice. D) The MFI of  $\alpha$ -SMA in aortic VSMCs of Sham and CKD mice ( $n = 6$ ). E) Representative FC analysis and the MFI of  $\alpha$ -SMA in hVSMCs incubated with normal or CKD serum ( $n = 5$ ). F) WB analysis of  $\alpha$ -SMA, MYH11, CNN1 and TAGLN expression levels in hVSMCs incubated with normal or CKD serum ( $n = 3$ ). G) Relative mRNA expression levels of  $\alpha$ -SMA, CNN1, MYH11 and TAGLN in hVSMCs incubated with normal or CKD serum ( $n = 3$ ). H) Representative images and quantification of VSMC migration from the media fragments of Sham/ApoE<sup>-/-</sup> and CKD/ApoE<sup>-/-</sup> mice. Data represent mean  $\pm$  SD. \* $P < 0.05$ , \*\* $P < 0.01$ , two-tailed Student's  $t$ -test.

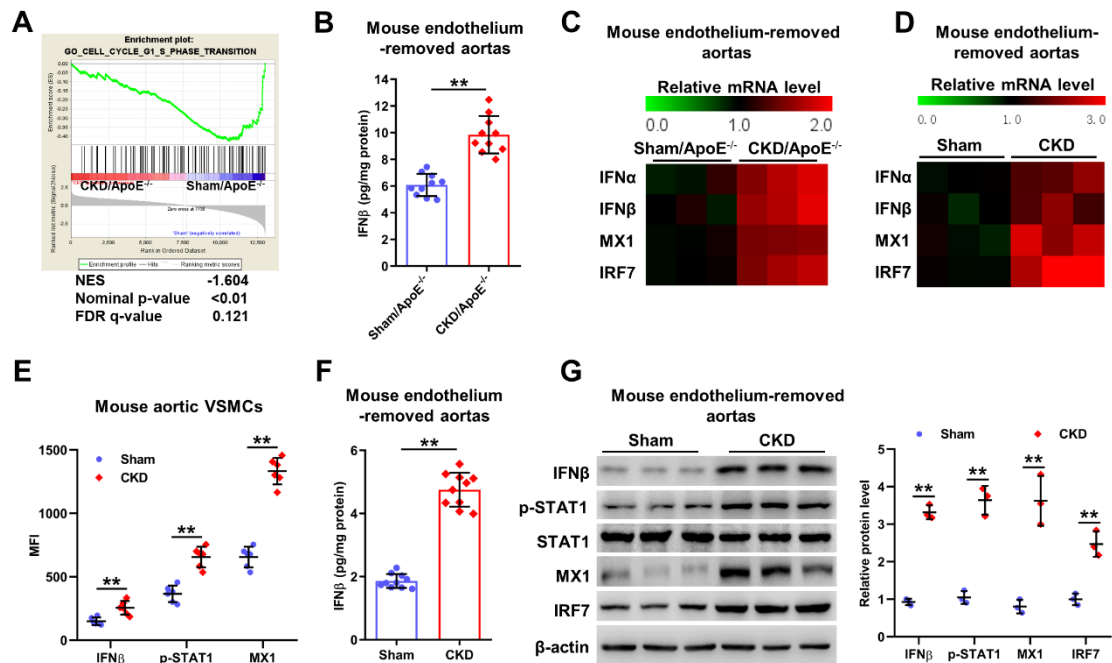

**Figure S5. CKD promotes IFN-I signaling activation in VSMCs in vivo.** A) GSEA analysis of G1-S transition gene set in aortic VSMCs of Sham/ApoE $^{-/-}$  and CKD/ApoE $^{-/-}$  mice. B) Quantification of IFN $\beta$  protein levels by ELISA in endothelium-removed aortas of Sham/ApoE $^{-/-}$  and CKD/ApoE $^{-/-}$  mice ( $n = 10$ ). C) Relative mRNA expression levels of IFN $\alpha$ , IFN $\beta$ , MX1 and IRF7 in endothelium-removed aortas of Sham/ApoE $^{-/-}$  and CKD/ApoE $^{-/-}$  mice. D) Relative mRNA expression levels of IFN $\alpha$ , IFN $\beta$ , MX1 and IRF7 in endothelium-removed aortas of Sham and CKD mice. E) The MFIs of IFN $\beta$ , p-STAT1 and MX1 in aortic VSMCs of Sham and CKD mice ( $n = 6$ ). F) Quantification of IFN $\beta$  protein levels by ELISA in endothelium-removed aortas of Sham and CKD mice ( $n = 10$ ). G) WB analysis of IFN $\beta$ , p-STAT1, MX1 and IRF7 expression levels in endothelium-removed aortas of Sham and CKD mice ( $n = 3$ ). Data represent mean  $\pm$  SD. \*\* $P < 0.01$ , two-tailed Student's  $t$ -test.

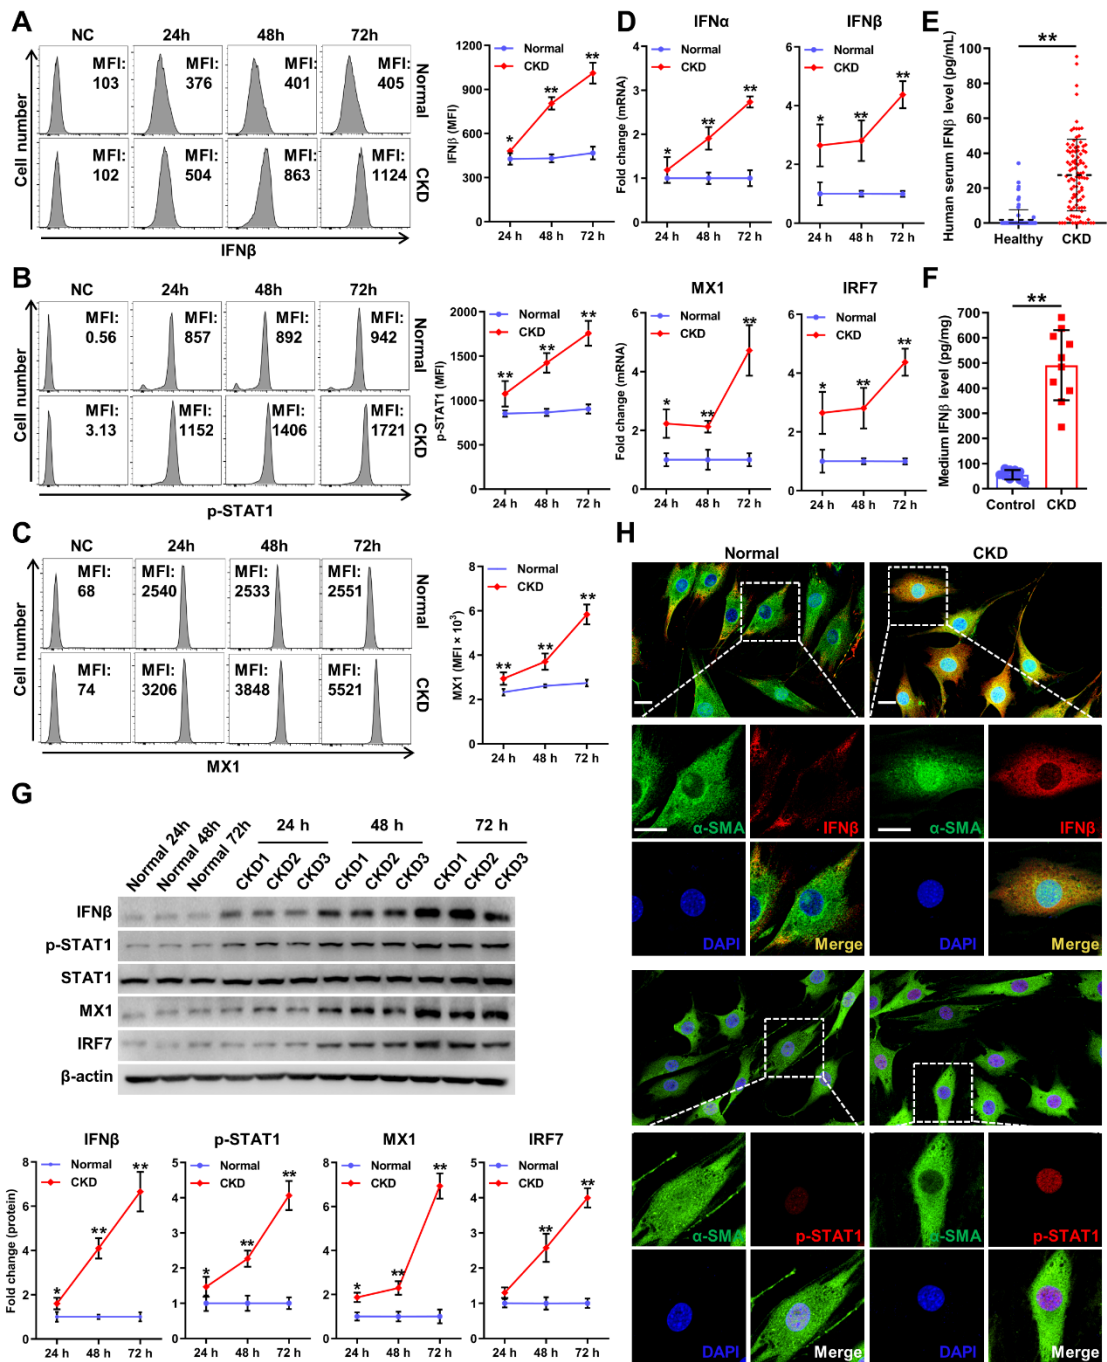

**Figure S6. CKD promotes IFN-I signaling activation in VSMCs in vitro in an autocrine/paracrine manner.** A-C) The MFIs of IFN $\beta$ , p-STAT1 and MX1 in hVSMCs incubated with normal or CKD serum ( $n = 5$ ). D) Relative mRNA expression levels of IFN $\alpha$ , IFN $\beta$ , MX1 and IRF7 in hVSMCs incubated with normal or CKD serum ( $n = 3$ ). E) Quantification of the serum IFN $\beta$  levels in healthy people ( $n = 92$ ) and CKD patients ( $n = 98$ ) by ELISA. Conversion factor, 1 U = 5 pg. F) Quantification of the medium IFN $\beta$  levels of hVSMC culture by ELISA after incubation with normal or CKD serum ( $n = 10$ ). G) WB analysis of IFN $\beta$ , p-STAT1, MX1 and IRF7 expression levels in hVSMCs incubated with normal or CKD serum at indicated time ( $n = 3$ ). H) Representative images of IFN $\beta$  and p-STAT1 IF staining in hVSMCs incubated with normal or CKD serum. The box indicates the region magnified in the down panels. Scale bars, 20  $\mu$ m. Data represent mean  $\pm$  SD. \* $P < 0.05$ , \*\* $P < 0.01$ , two-tailed Student's  $t$ -test was applied to A-D, F, G; Mann-Whitney U test was applied to E.



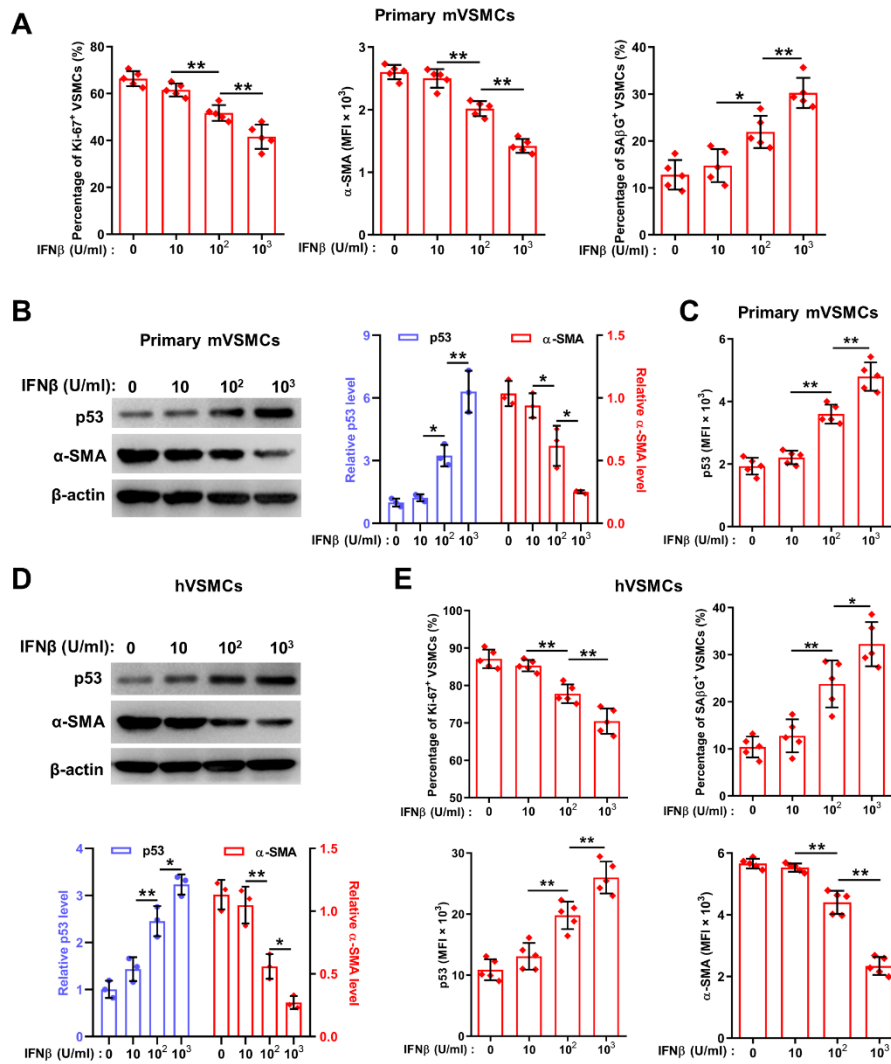

**Figure S7. IFN-I promotes VSMC premature senescence and phenotypic switching in both human and mouse VSMCs.** A) The percentages of SAβG<sup>+</sup> and Ki-67<sup>+</sup> cells, as well as the MFI of α-SMA in primary mouse VSMCs (mVSMCs) after treatment with indicated dose of IFNβ ( $n = 5$  independent experiments). B) WB analysis of p53 and α-SMA expression levels in primary mouse VSMCs (mVSMCs) after treatment with indicated dose of IFNβ ( $n = 3$ ). C) The MFI of p53 in primary mVSMCs after treatment with indicated dose of IFNβ ( $n = 5$  independent experiments). D) WB analysis of p53 and α-SMA expression levels in hVSMCs treated with indicated dose of IFNβ ( $n = 3$ ). E) The percentages of Ki-67<sup>+</sup> and SAβG<sup>+</sup> cells, as well as the MFIs of p53 and α-SMA in hVSMCs treated with indicated dose of IFNβ ( $n = 5$ ). Data represent mean ± SD. \* $P < 0.05$ , \*\* $P < 0.01$ , one-way ANOVA.

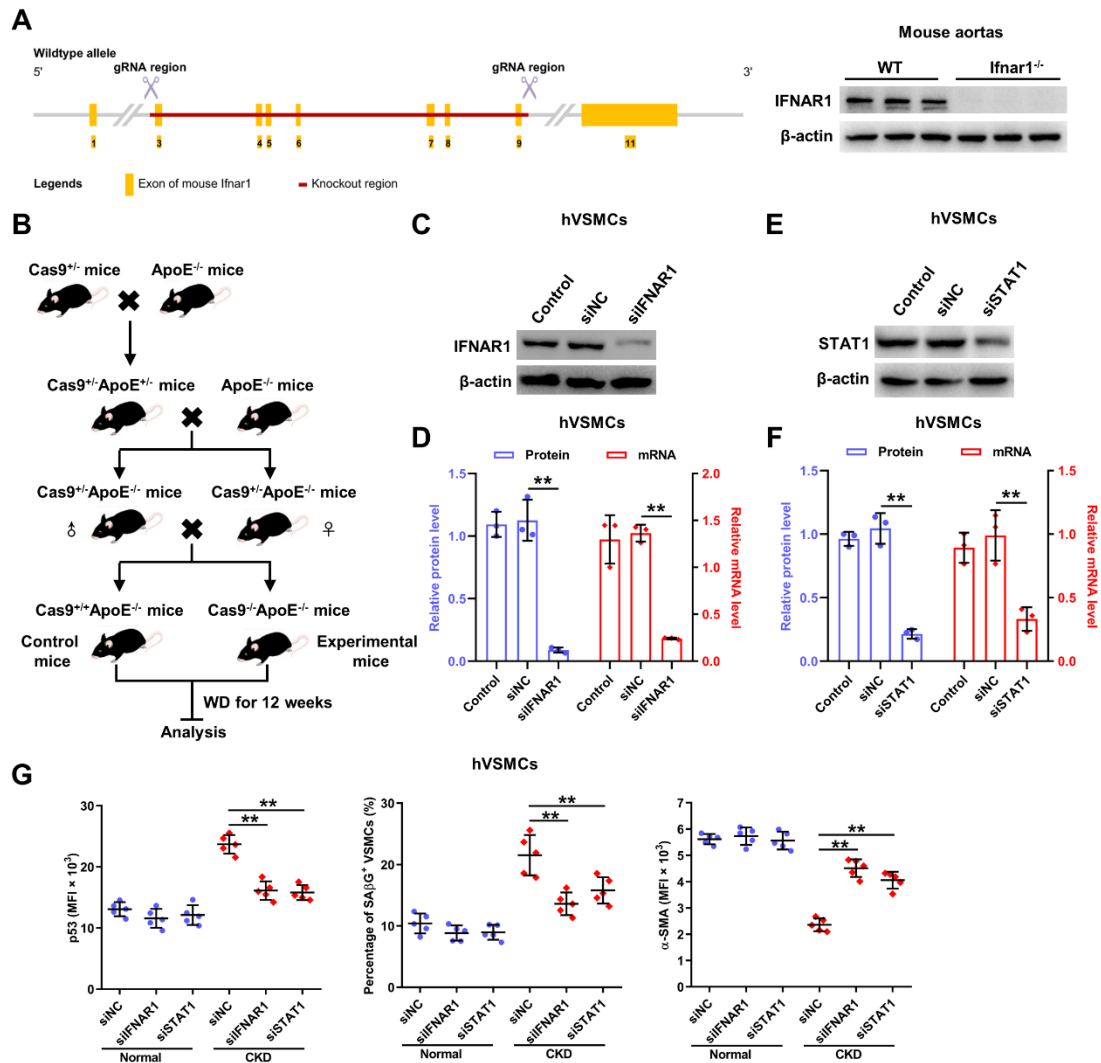

**Figure S8. Defect in the IFN-I signaling mitigates CKD-induced VSMC premature senescence and phenotypic switching.** A) Scheme for *Ifnar1*<sup>-/-</sup> mice creation using CRISPR/Cas9 technique (left panel). IFNAR1 knockout in aortas was verified by WB (right panel). B) Scheme for CRISPR/Cas9 mice and *ApoE*<sup>-/-</sup> mice crossing. C-F) Representative WB analysis, as well as the relative protein and mRNA expression levels of IFNAR1 and STAT1 after RNA interference as indicated ( $n = 3$ ). G) The percentage of SAβG<sup>+</sup> hVSMCs, as well as the MFIs of p53 and α-SMA in siIFNAR1 and siSTAT1-transfected hVSMCs incubated with normal or CKD serum ( $n = 5$ ). Data represent mean ± SD. \*\* $P < 0.01$ , one-way ANOVA.

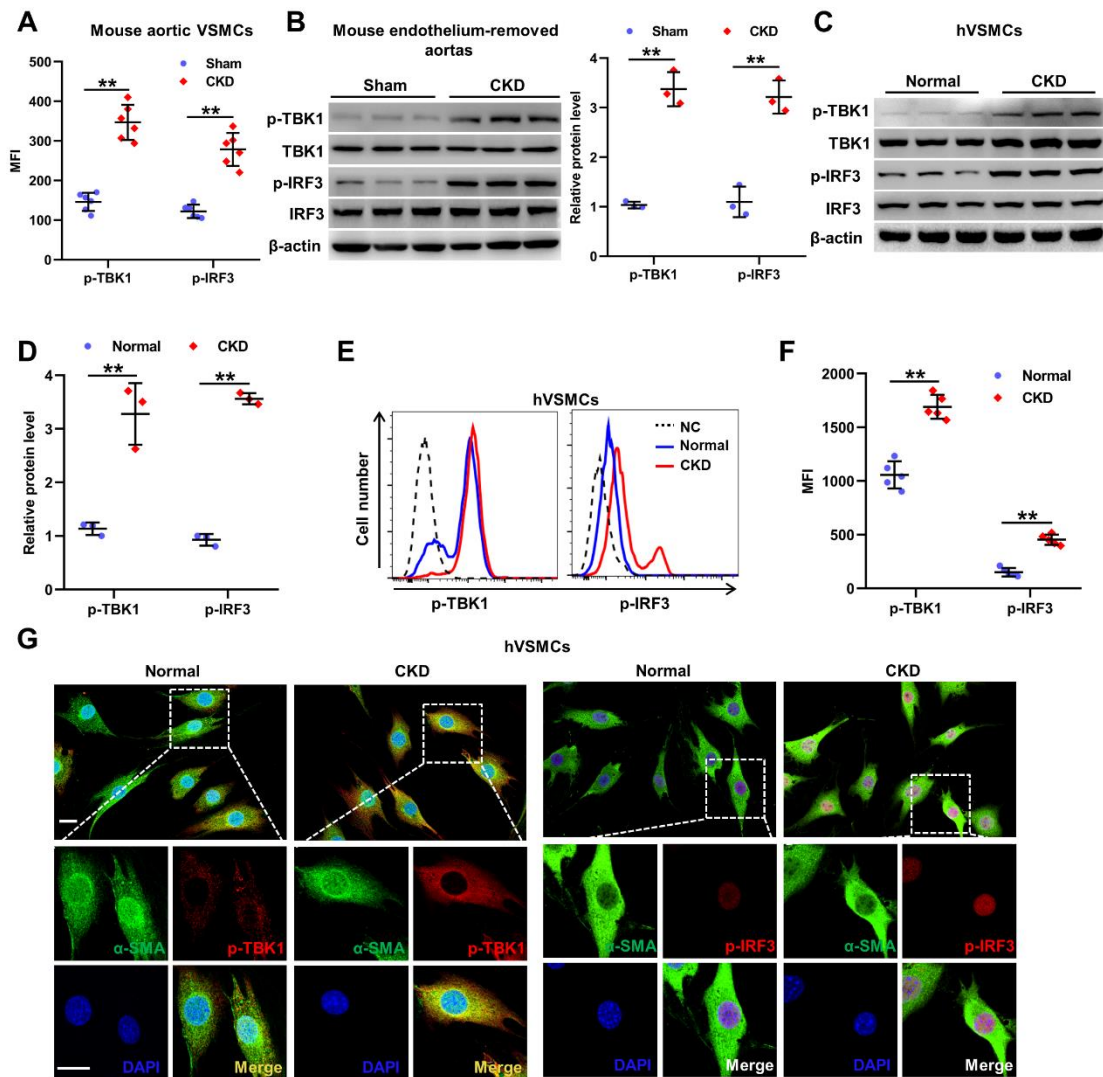

**Figure S9. CKD promotes cGAS-STING pathway activation in VSMCs both in vivo and in vitro.** A) The MFIs of p-TBK1 and p-IRF3 in aortic VSMCs from Sham and CKD mice ( $n = 6$ ). B) WB analysis of p-TBK1 and p-IRF3 expressions in endothelium-removed aortas from Sham and CKD mice ( $n = 3$ ). C,D) WB analysis of p-TBK1 and p-IRF3 expression levels in hVSMCs incubated with normal or CKD serum ( $n = 3$ ). E,F) The MFIs of p-TBK1 and p-IRF3 in hVSMCs incubated with normal or CKD serum by FC ( $n = 5$ ). G) Representative images of p-TBK1 and p-IRF3 IF staining in hVSMCs incubated with normal or CKD serum. The box indicates the region magnified in the down panels. Scale bars, 20  $\mu\text{m}$ . Data represent mean  $\pm$  SD.  $**P < 0.01$ , two-tailed Student's  $t$ -test.

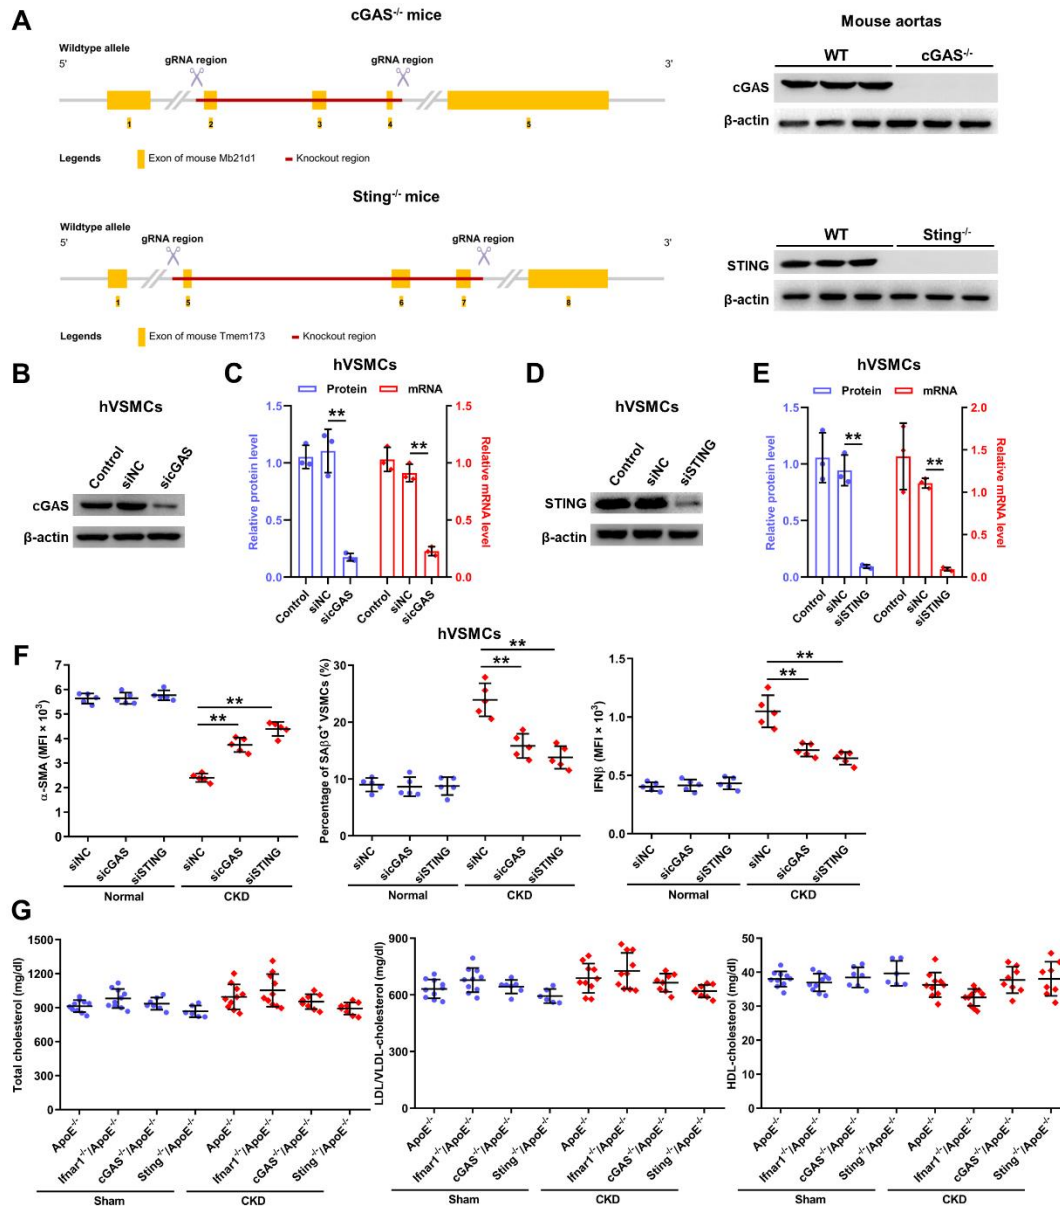

**Figure S10. Defect in the cGAS-STING pathway mitigates CKD-induced IFN-I response, premature senescence and phenotypic switching in VSMCs without affecting serum cholesterol levels.** A) Scheme for cGAS<sup>-/-</sup> and Sting<sup>-/-</sup> mice creation using CRISPR/Cas9 technique (left panels). Gene knockout in aortas for each mouse was verified by WB (right panels). B-E) Representative WB analysis, as well as the relative protein and mRNA expression levels of cGAS and STING in hVSMCs after RNA interference as indicated ( $n = 3$ ). F) The percentage of SAβG<sup>+</sup> hVSMCs, as well as the MFIs of IFNβ and α-SMA in hVSMCs after RNA interference as indicated ( $n = 5$ ). G) Serum levels of total cholesterol, LDL/VLDL-cholesterol and HDL-cholesterol in Sham/ApoE<sup>-/-</sup> ( $n = 10$ ), Sham/Ifnar1<sup>-/-</sup>/ApoE<sup>-/-</sup> ( $n = 10$ ), Sham/cGAS<sup>-/-</sup>/ApoE<sup>-/-</sup> ( $n = 7$ ), Sham/Sting<sup>-/-</sup>/ApoE<sup>-/-</sup> ( $n = 6$ ), CKD/ApoE<sup>-/-</sup> ( $n = 10$ ), CKD/Ifnar1<sup>-/-</sup>/ApoE<sup>-/-</sup> ( $n = 10$ ), CKD/cGAS<sup>-/-</sup>/ApoE<sup>-/-</sup> ( $n = 8$ ) and CKD/Sting<sup>-/-</sup>/ApoE<sup>-/-</sup> ( $n = 8$ ) mice. Data represent mean ± SD. \*\* $P < 0.01$ , one-way ANOVA.

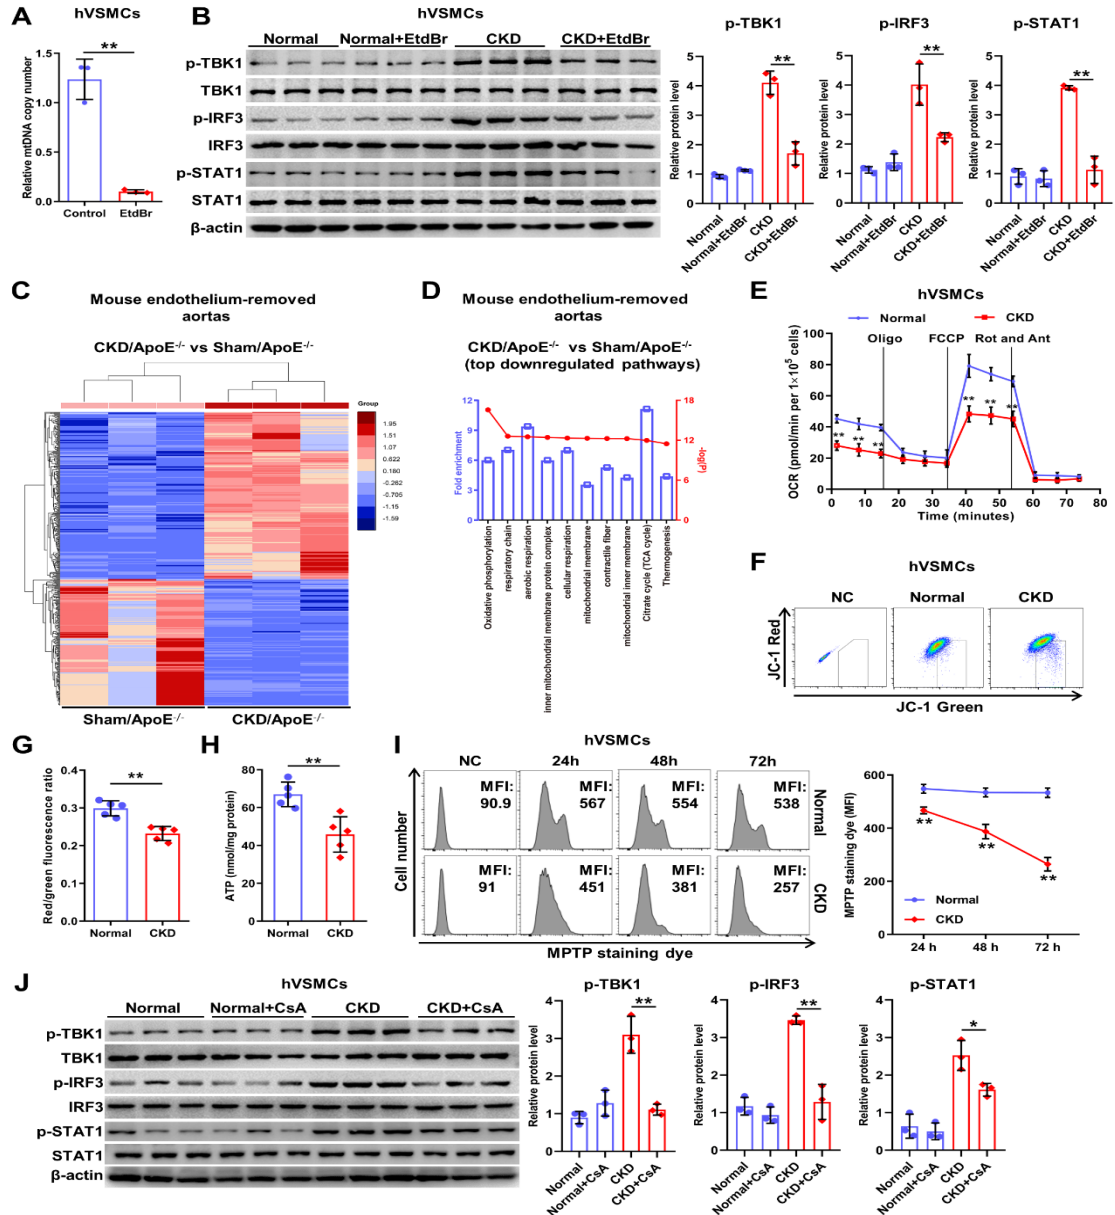

**Figure S11. Endogenous mtDNA is responsible for CKD-induced cGAS-STING activation and subsequent IFN-I response in VSMCs.** A) Quantitative PCR (qPCR) analysis of mtDNA contents in hVSMCs pretreated with or without EtdBr ( $n = 3$ ). B) WB analysis of p-TBK1, p-IRF3 and p-STAT1 expression levels in hVSMCs incubated with normal or CKD serum after EtdBr pretreatment ( $n = 3$ ). C) The heat map shows the differently expressed genes in endothelium-removed aortas between the two groups as indicated based on the proteomics data. D) KEGG and GO enrichment analysis of top downregulated pathways in endothelium-removed aortas of CKD/ApoE<sup>-/-</sup> mice based on the proteomics data. E) Seahorse analysis of oxygen consumption rate (OCR) in hVSMCs after incubation with normal or CKD serum ( $n = 3$ ). F,G) Representative FC analysis and quantification of mitochondrial membrane potential in hVSMCs incubated with normal or CKD serum ( $n = 5$ ). H) Relative ATP levels in hVSMCs incubated with normal or CKD serum ( $n = 5$ ). I) The MPTP permeability in hVSMCs incubated with normal or CKD serum ( $n = 5$ ). J) WB analysis of p-TBK1, p-IRF3 and p-STAT1 expression levels in hVSMCs incubated with normal or CKD serum after CsA pretreatment ( $n = 3$ ). Data represent mean  $\pm$  SD.  $**P < 0.01$ , two-tailed Student's  $t$ -test was applied to E,G,H,I; one-way ANOVA was applied to B,J.



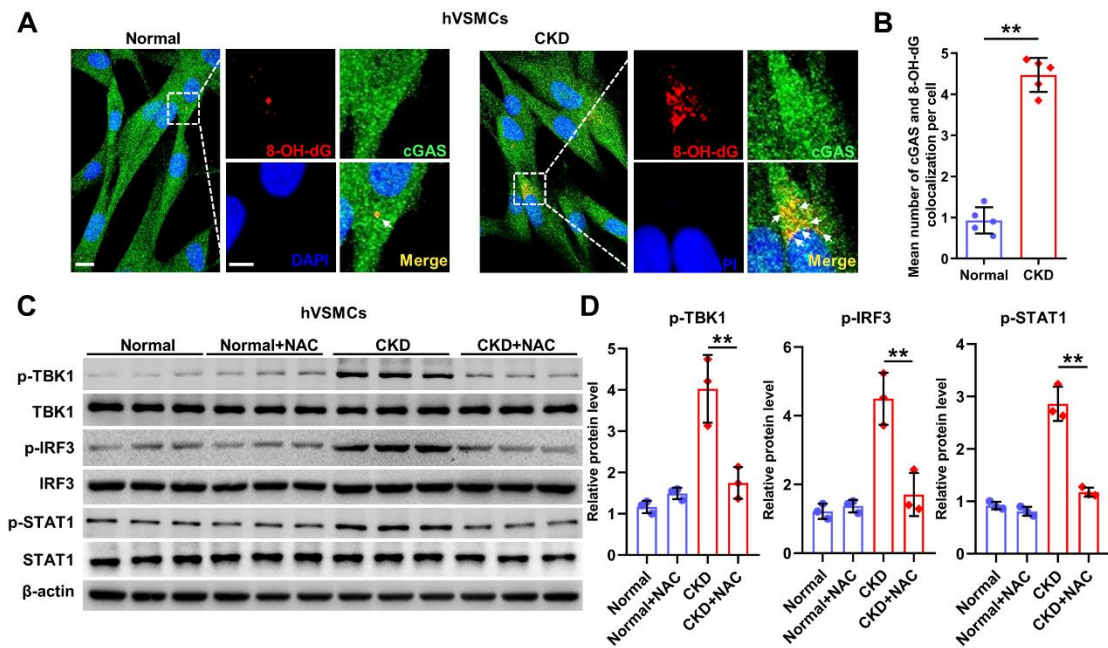

**Figure S12. Oxidative stress plays a key role in CKD-induced mitochondrial damage and IFN-I response in hVSMCs.** A,B) Representative images of cGAS and 8-OH-dG colocalization in hVSMCs incubated with normal or CKD serum. The box indicates the region magnified in the right panels. The arrow indicates cGAS and 8-OH-dG colocalization. Scale bar (lower magnification), 10  $\mu$ m. Scale bar (higher magnification), 5  $\mu$ m. C,D) The mean number of cGAS and 8-OH-dG colocalization per hVSMC after incubation with normal or CKD serum ( $n = 5$  independent experiments). C) WB analysis of p-TBK1, p-IRF3 and p-STAT1 expression levels in hVSMCs incubated with normal or CKD serum after NAC pretreatment ( $n = 3$ ). Data represent mean  $\pm$  SD.  $**P < 0.01$ , two-tailed Student's  $t$ -test was applied to B; one-way ANOVA was applied to D.

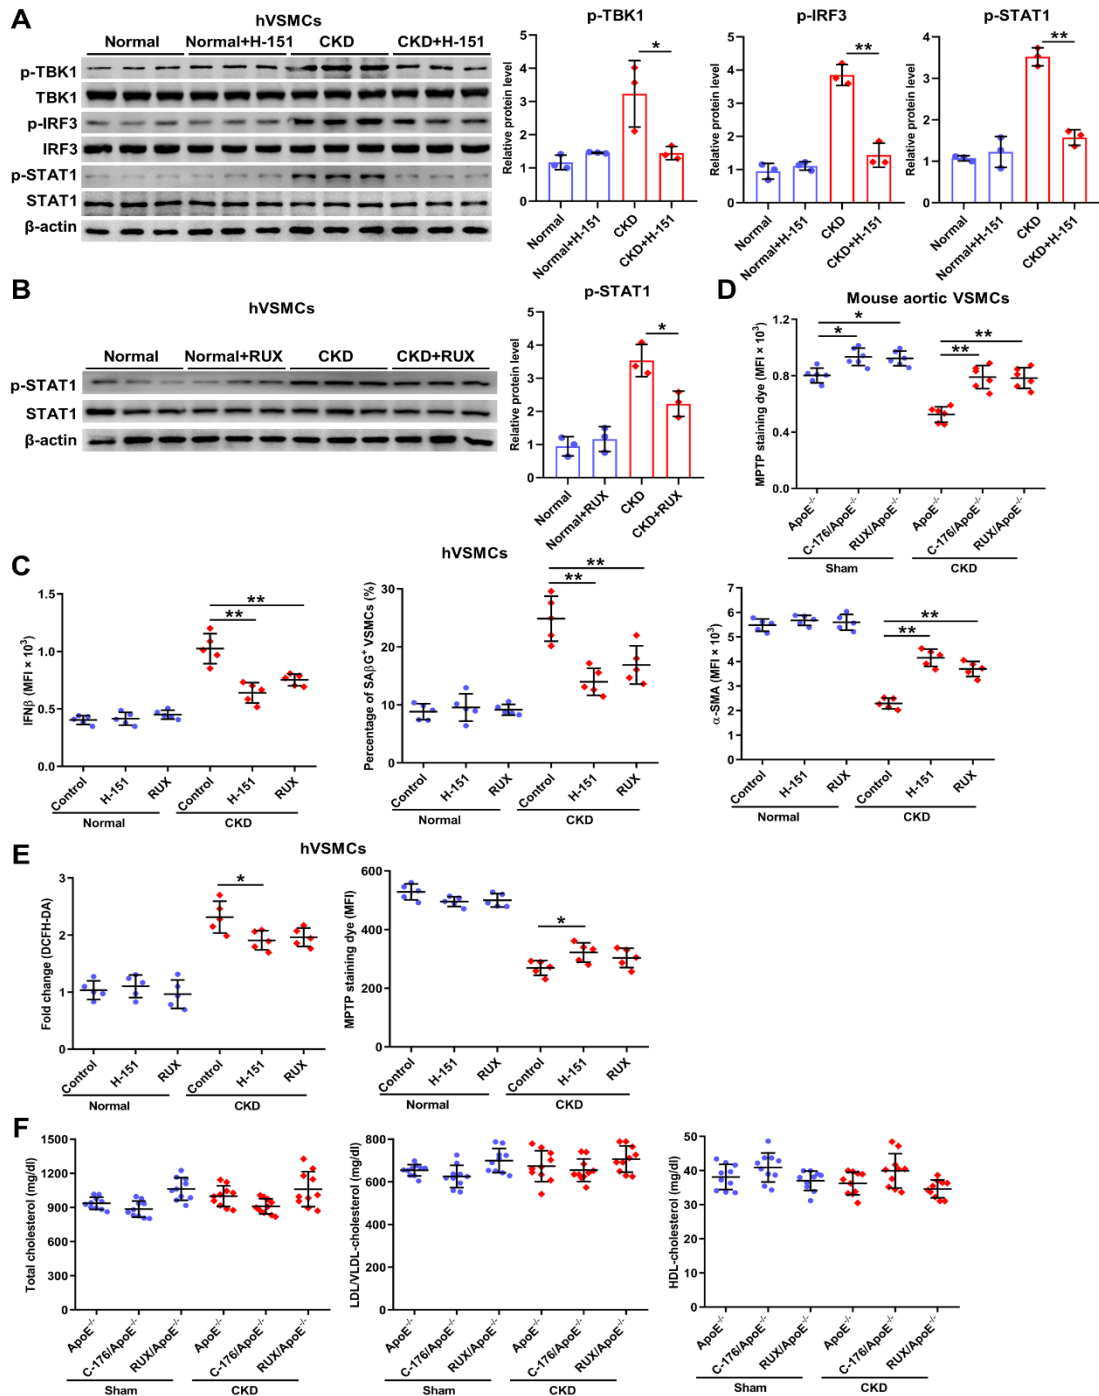

**Figure S13. Pharmacological inhibition of IFN-I response mitigates oxidative stress and mitochondrial damage in VSMCs without affecting serum cholesterol levels.** A,B) WB analysis of p-TBK1, p-IRF3 and p-STAT1 expression levels in hVSMCs incubated with normal or CKD serum after H-151 or RUX pretreatment ( $n = 3$ ). C) The percentage of SA $\beta$ G $^+$  hVSMCs, as well as the MFIs of IFN $\beta$  and  $\alpha$ -SMA in hVSMCs incubated with normal or CKD serum after H-151 or RUX pretreatment ( $n = 5$ ). D) The MPTP permeability in aortic VSMCs of Sham/ApoE $^{-/-}$  and CKD/ApoE $^{-/-}$  mice after C-176 or RUX treatment ( $n = 6$ ). E) The fold change of DCFH-DA and MPTP permeability in hVSMCs incubated with normal or CKD serum after H-151 or RUX pretreatment ( $n = 5$ ). F) Serum levels of total cholesterol, LDL/VLDL-cholesterol and HDL-cholesterol in Sham/ApoE $^{-/-}$  and CKD/ApoE $^{-/-}$  mice after C-176 or RUX treatment ( $n = 10$ ). Data represent mean  $\pm$  SD. \* $P < 0.05$ , \*\* $P < 0.01$ , one-way ANOVA.

**Table S1**

|                       | <b>WD For 12 weeks</b>         |                               |                                                                            |
|-----------------------|--------------------------------|-------------------------------|----------------------------------------------------------------------------|
| <b>Parameter</b>      | <b>Sham/ApoE<sup>-/-</sup></b> | <b>CKD/ApoE<sup>-/-</sup></b> | <b>P Value<br/>(CKD/ApoE<sup>-/-</sup> vs<br/>Sham/ApoE<sup>-/-</sup>)</b> |
| Number                | 10                             | 10                            | —                                                                          |
| Age<br>(weeks)        | 22                             | 22                            | —                                                                          |
| Final<br>weight (g)   | 31.05 ± 2.58                   | 34.61 ± 3.33                  | NS                                                                         |
| Creatinine<br>(mg/dl) | 0.63 ± 0.07                    | 0.76 ± 0.09                   | <i>P</i> < 0.01                                                            |
| BUN<br>(mg/dl)        | 41.11 ± 3.68                   | 77.08 ± 5.86                  | <i>P</i> < 0.01                                                            |

Data represent mean ± SD. One-way ANOVA. NS, not significant.

**Table S2**

| Sham/ApoE <sup>-/-</sup> |                       |    | CKD/ApoE <sup>-/-</sup> |                       |    |
|--------------------------|-----------------------|----|-------------------------|-----------------------|----|
|                          | Myocardial infarction |    |                         | Myocardial infarction |    |
| Days after WD            | Anatomy               | HE | Days after WD           | Anatomy               | HE |
| 111                      |                       |    | 81                      |                       |    |
| 147                      |                       |    | 107                     |                       |    |
| 178                      |                       |    | 119                     |                       |    |
| 192                      |                       |    | 133                     | x                     | ✓  |
| 246                      | x                     | ✓  | 150                     | x                     | ✓  |
| 246                      |                       |    | 150                     |                       |    |
| 263                      |                       |    | 169                     | ✓                     | ✓  |
| 277                      |                       |    | 189                     | x                     | ✓  |
|                          |                       |    | 189                     |                       |    |
|                          |                       |    | 202                     | ✓                     | ✓  |

The time and detection for myocardial infarction. “✓” represents “detected”; “x” represents “no obvious lesion observed”.

**Table S3**

| <b>Antibody</b>          | <b>Origin</b>             | <b>Catalog number</b> | <b>Assay</b> |
|--------------------------|---------------------------|-----------------------|--------------|
| p53 antibody             | Cell Signaling Technology | Cat# 2524             | WB, IF, FC   |
| p16 antibody             | Abcam                     | Cat# ab189034         | WB, IF, FC   |
| $\gamma$ -H2AX           | Cell Signaling Technology | Cat# 7631             | IF           |
| $\alpha$ -SMA antibody   | Abcam                     | Cat# ab5694           | WB, IF, IHC  |
| CD31 antibody            | Abcam                     | Cat# ab24590          | IF           |
| MYH11 antibody           | Abcam                     | Cat# ab53219          | WB           |
| CNN1 antibody            | Abcam                     | Cat# ab46794          | WB           |
| TAGLN antibody           | Abcam                     | Cat# ab14106          | WB           |
| IFN $\beta$ antibody     | Abcam                     | Cat# ab85803          | WB, IF, FC   |
| IFNAR1 antibody          | Novus Biologicals         | Cat# NBP2-67339       | WB           |
| cGAS antibody            | Santa Cruz Biotechnology  | Cat# sc-515777        | WB, IF       |
| STING antibody           | Cell Signaling Technology | Cat# 13647            | WB           |
| p-TBK1 (Ser172) antibody | Cell Signaling Technology | Cat# 5483             | WB, IF       |
| TBK1 antibody            | Abcam                     | Cat# ab40676          | WB           |
| p-IRF3 (Ser396) antibody | Cell Signaling Technology | Cat# 29047            | WB, IF       |
| IRF3 antibody            | Cell Signaling Technology | Cat# 4302             | WB           |



|                                                      |                           |                 |         |
|------------------------------------------------------|---------------------------|-----------------|---------|
| p-STAT1 (Tyr701) antibody                            | Cell Signaling Technology | Cat# 9167       | WB, IF  |
| STAT1 Antibody                                       | Cell Signaling Technology | Cat# 14994      | WB      |
| IRF7 antibody                                        | Novus Biologicals         | Cat# NBP2-67634 | WB      |
| MX1 antibody                                         | Abcam                     | Cat# ab222856   | WB, FC  |
| $\beta$ -actin antibody                              | Abcam                     | Cat# ab8226     | WB      |
| cGAS antibody                                        | Abcam                     | Cat# ab224144   | IF      |
| $\alpha$ -SMA antibody                               | Novus Biologicals         | Cat# NB300-978  | IF      |
| HRP labeled goat anti-Rabbit IgG (H+L)               | Abcam                     | Cat# 205718     | WB, IHC |
| HRP labeled goat anti-Mouse IgG (H+L)                | Abcam                     | Cat# 205719     | WB      |
| Ki-67 Monoclonal Antibody (SolA15), eFluor 660       | eBioscience               | Cat# 50-5698-80 | FC      |
| CD31 (PECAM-1) Monoclonal Antibody (390), eFluor 450 | eBioscience               | Cat# 48-0311-82 | FC      |
| CD45 Monoclonal Antibody (30-F11), eFluor 450        | eBioscience               | Cat# 48-0451-82 | FC      |
| TER-119 Monoclonal antibody (TER-119), eFluor 450    | eBioscience               | Cat# 48-5921-80 | FC      |
| CD31 (PECAM-1) Monoclonal Antibody (390), PE         | eBioscience               | Cat# 12-0311-82 | FC      |
| CD45 Monoclonal Antibody (30-F11), FITC              | eBioscience               | Cat# 11-0451-82 | FC      |

|                                                                                 |             |                 |    |
|---------------------------------------------------------------------------------|-------------|-----------------|----|
| TER-119 Monoclonal Antibody (TER-119), FITC                                     | eBioscience | Cat# 11-5921-82 | FC |
| CD31 (PECAM-1) Monoclonal Antibody (WM-59 (WM59)), FITC                         | eBioscience | Cat# 11-0319-42 | FC |
| CD45 Monoclonal Antibody (HI30), FITC                                           | eBioscience | Cat# 11-0459-42 | FC |
| CD235a (Glycophorin A) Monoclonal Antibody (HIR2 (GA-R2)), FITC                 | eBioscience | Cat# 11-9987-82 | FC |
| CD45 Monoclonal Antibody (HI30), PE                                             | eBioscience | Cat# 12-0459-42 | FC |
| CD31 (PECAM-1) Monoclonal Antibody (WM-59 (WM59)), eFluor 450                   | eBioscience | Cat# 48-0319-42 | FC |
| CD45 Monoclonal Antibody (HI30), eFluor 450                                     | eBioscience | Cat# 48-0459-42 | FC |
| CD235a (Glycophorin A) Monoclonal Antibody (HIR2 (GA-R2)), eFluor 450           | eBioscience | Cat# 48-9987-42 | FC |
| CD11b Monoclonal Antibody (M1/70), APC                                          | eBioscience | Cat# 17-0112-82 | FC |
| CD68 Monoclonal Antibody (FA-11), PE                                            | eBioscience | Cat# 12-0681-82 | FC |
| $\alpha$ -SMA Monoclonal antibody (1A4), eFluor 660                             | eBioscience | Cat# 50-9760-82 | FC |
| Anti-TAGLN/Transgelin antibody                                                  | Abcam       | Cat# ab10135    | FC |
| Anti-smooth muscle Myosin heavy chain 11 antibody [EPR5336b] (Alexa Fluor® 647) | Abcam       | Cat# ab196982   | FC |
| p-STAT1 (Ser727) antibody (Alexa Fluor 647 Conjugate)                           | Biolegend   | Cat# 686412     | FC |

|                                                                                     |                              |               |          |
|-------------------------------------------------------------------------------------|------------------------------|---------------|----------|
| p-TBK1 (Ser172) antibody<br>(Alexa Fluor 647 Conjugate)                             | Cell Signaling<br>Technology | Cat# 14590    | FC       |
| p-IRF3 (Ser396) antibody<br>(Alexa Fluor 647 Conjugate)                             | Cell Signaling<br>Technology | Cat# 10327    | FC       |
| Goat anti-Rabbit IgG (H+L)<br>Cross-Adsorbed Secondary<br>antibody, Alexa Fluor 647 | Thermo Fisher<br>Scientific  | Cat# A-21244  | FC       |
| Goat anti-Mouse IgG (H+L)<br>Cross-Adsorbed Secondary<br>Antibody, Alexa Fluor 647  | Thermo Fisher<br>Scientific  | Cat# A-21235  | FC       |
| 8-OH-dG antibody                                                                    | Abcam                        | Cat# ab48508  | IF       |
| DNA antibody                                                                        | Millipore                    | Cat# CBL186   | IF       |
| Goat anti-Mouse IgG (H+L)<br>Cross-Adsorbed Secondary<br>antibody, Alexa Fluor 488  | Thermo Fisher<br>Scientific  | Cat# A-11001  | IF       |
| Goat anti-Mouse IgG (H+L)<br>Cross-Adsorbed Secondary<br>antibody, Alexa Fluor 546  | Thermo Fisher<br>Scientific  | Cat# A-11003  | IF       |
| Goat anti-Rabbit IgG (H+L)<br>Cross-Adsorbed Secondary<br>antibody, Alexa Fluor 488 | Thermo Fisher<br>Scientific  | Cat# A-11008  | IF       |
| Goat anti-Rabbit IgG (H+L)<br>Cross-Adsorbed Secondary<br>antibody, Alexa Fluor 546 | Thermo Fisher<br>Scientific  | Cat# A-11010  | IF       |
| Donkey anti-Goat IgG (H+L)<br>Cross-Adsorbed Secondary<br>antibody, Alexa Fluor 647 | Abcam                        | Cat# ab150131 | IF       |
| Monoclonal ANTI-Flag® M2<br>antibody                                                | Sigma-Aldrich                | Cat# F1804    | WB, ChIP |

Antibodies used in WB, IF, FC, IHC and ChIP analysis.

**Table S4**

| Gene name | Regulated Type | CKD/ApoE <sup>-/-</sup> /<br>Sham/ApoE <sup>-/-</sup><br>P value | Sham /<br>ApoE <sup>-/-</sup> | Sham /ApoE <sup>-/-</sup> | Sham /ApoE <sup>-/-</sup> | CKD/<br>ApoE <sup>-/-</sup> | CKD/<br>ApoE <sup>-/-</sup> | CKD/<br>ApoE <sup>-/-</sup> |
|-----------|----------------|------------------------------------------------------------------|-------------------------------|---------------------------|---------------------------|-----------------------------|-----------------------------|-----------------------------|
| Ttn       | Down           | 0.0236                                                           | 1.653                         | 1.132                     | 2.943                     | 0.302                       | 0.293                       | 0.302                       |
| Myh4      | Down           | 0.00872                                                          | 1.905                         | 1.281                     | 2.613                     | 0.208                       | 0.208                       | 0.202                       |
| Myh1      | Down           | 0.035                                                            | 2.61                          | 0.865                     | 2.083                     | 0.285                       | 0.283                       | 0.301                       |
| Myh8      | Down           | 0.00496                                                          | 2.69                          | 1.224                     | 1.112                     | 0.2                         | 0.333                       | 0.268                       |
| Acta1     | Down           | 0.00748                                                          | 2.123                         | 1.369                     | 1.799                     | 0.396                       | 0.403                       | 0.377                       |
| Fbn1      | Up             | 0.00652                                                          | 0.771                         | 0.721                     | 0.662                     | 1.375                       | 1.024                       | 1.354                       |
| Atp2a1    | Down           | 0.0207                                                           | 1.579                         | 1.075                     | 3.132                     | 0.215                       | 0.199                       | 0.198                       |
| Myh3      | Down           | 0.000561                                                         | 1.872                         | 1.582                     | 2.658                     | 0.272                       | 0.188                       | 0.15                        |
| Alb       | Up             | 0.00892                                                          | 0.757                         | 0.776                     | 0.659                     | 1.039                       | 1.192                       | 1.437                       |
| Myl1      | Down           | 0.0196                                                           | 1.744                         | 1.117                     | 2.948                     | 0.251                       | 0.251                       | 0.242                       |
| Mybpc2    | Down           | 0.023                                                            | 1.557                         | 1.141                     | 3.113                     | 0.249                       | 0.275                       | 0.241                       |
| Aco2      | Down           | 0.0293                                                           | 1.425                         | 1.053                     | 1.329                     | 0.889                       | 0.881                       | 0.653                       |
| Ckm       | Down           | 0.0342                                                           | 1.446                         | 1.023                     | 3.45                      | 0.259                       | 0.267                       | 0.237                       |
| Fn1       | Up             | 0.00526                                                          | 0.639                         | 0.813                     | 0.604                     | 1.454                       | 1.252                       | 1.147                       |
| Tf        | Up             | 0.000461                                                         | 0.456                         | 0.5                       | 0.44                      | 1.199                       | 1.469                       | 1.696                       |
| Mylpf     | Down           | 0.0225                                                           | 1.558                         | 1.108                     | 3.065                     | 0.251                       | 0.242                       | 0.242                       |
| Pygm      | Down           | 0.00852                                                          | 1.362                         | 1.04                      | 3.359                     | 0.325                       | 0.306                       | 0.257                       |
| Flnc      | Down           | 0.0136                                                           | 1.109                         | 1.217                     | 1.784                     | 0.761                       | 0.704                       | 0.691                       |
| Actn3     | Down           | 0.0064                                                           | 2.518                         | 1.47                      | 1.803                     | 0.272                       | 0.263                       | 0.262                       |
| Myom1     | Down           | 0.00314                                                          | 1.646                         | 1.093                     | 3.23                      | 0.262                       | 0.214                       | 0.226                       |
| Acly      | Down           | 0.0389                                                           | 1.721                         | 1.152                     | 1.094                     | 0.654                       | 0.75                        | 0.916                       |
| Tagln2    | Up             | 0.033                                                            | 0.336                         | 0.583                     | 0.505                     | 1.625                       | 2.03                        | 0.766                       |
| Ryr1      | Down           | 0.0327                                                           | 1.481                         | 1.114                     | 2.667                     | 0.406                       | 0.405                       | 0.416                       |
| C3        | Up             | 0.000358                                                         | 0.605                         | 0.634                     | 0.573                     | 1.208                       | 1.336                       | 1.513                       |
| Mdh2      | Down           | 0.0269                                                           | 1.388                         | 0.998                     | 1.411                     | 0.886                       | 0.828                       | 0.729                       |
| Lmna      | Down           | 0.0422                                                           | 1.054                         | 1.515                     | 1.273                     | 0.672                       | 0.678                       | 1.004                       |
| Msn       | Up             | 0.0181                                                           | 0.736                         | 0.849                     | 0.709                     | 1.246                       | 1.445                       | 0.998                       |
| Eno3      | Down           | 0.00532                                                          | 1.506                         | 1.034                     | 3.552                     | 0.258                       | 0.227                       | 0.21                        |
| Obscn     | Down           | 0.0383                                                           | 1.488                         | 1.057                     | 2.662                     | 0.424                       | 0.425                       | 0.42                        |
| Atp1a2    | Down           | 0.0178                                                           | 1.237                         | 1.053                     | 1.712                     | 0.779                       | 0.739                       | 0.716                       |
| Cp        | Up             | 0.000517                                                         | 0.547                         | 0.585                     | 0.539                     | 1.214                       | 1.328                       | 1.618                       |
| Gpd2      | Down           | 0.00832                                                          | 1.443                         | 1.101                     | 1.392                     | 0.841                       | 0.808                       | 0.677                       |
| Actn2     | Down           | 0.00654                                                          | 2.497                         | 1.082                     | 1.727                     | 0.519                       | 0.406                       | 0.429                       |
| Fga       | Up             | 0.0307                                                           | 0.921                         | 0.751                     | 0.516                     | 1.312                       | 1.166                       | 1.28                        |
| Cfh       | Up             | 0.000201                                                         | 0.492                         | 0.621                     | 0.544                     | 1.343                       | 1.426                       | 1.346                       |
| Srl       | Down           | 0.00814                                                          | 1.492                         | 1.004                     | 3.167                     | 0.355                       | 0.31                        | 0.281                       |
| Cs        | Down           | 0.00878                                                          | 1.495                         | 1.106                     | 1.353                     | 0.864                       | 0.811                       | 0.717                       |

|           |      |           |       |       |       |       |       |       |
|-----------|------|-----------|-------|-------|-------|-------|-------|-------|
| Mrc1      | Up   | 0.000222  | 0.633 | 0.609 | 0.582 | 1.281 | 1.271 | 1.52  |
| Calr      | Up   | 0.00188   | 0.788 | 0.828 | 0.732 | 1.247 | 1.292 | 1.102 |
| Pgm1      | Down | 0.0493    | 1.273 | 0.923 | 2.322 | 0.592 | 0.691 | 0.67  |
| Pvalb     | Down | 0.0341    | 1.531 | 0.946 | 3.355 | 0.26  | 0.236 | 0.218 |
| Pdha1     | Down | 0.00736   | 1.473 | 1.093 | 1.469 | 0.844 | 0.748 | 0.745 |
| Pls3      | Up   | 0.0319    | 0.539 | 0.898 | 0.666 | 1.259 | 1.483 | 1.021 |
| Sucla2    | Down | 0.0245    | 1.5   | 1.093 | 1.413 | 0.852 | 0.877 | 0.601 |
| Hpx       | Up   | 0.000856  | 0.454 | 0.469 | 0.405 | 1.199 | 1.361 | 1.821 |
| Dlat      | Down | 0.0041    | 1.408 | 1.116 | 1.447 | 0.826 | 0.75  | 0.721 |
| Pdhb      | Down | 0.00638   | 1.442 | 1.082 | 1.282 | 0.834 | 0.8   | 0.79  |
| Idh3a     | Down | 0.0137    | 1.413 | 1.104 | 1.351 | 0.876 | 0.9   | 0.717 |
| Pfkm      | Down | 0.0204    | 1.289 | 1.034 | 2.672 | 0.538 | 0.553 | 0.425 |
| Anpep     | Up   | 0.00116   | 0.53  | 0.71  | 0.604 | 1.247 | 1.301 | 1.429 |
| Anxa1     | Up   | 0.00152   | 0.604 | 0.783 | 0.649 | 1.316 | 1.357 | 1.212 |
| Anxa5     | Up   | 0.000865  | 0.675 | 0.769 | 0.668 | 1.216 | 1.37  | 1.177 |
| Apob      | Up   | 0.0000159 | 0.424 | 0.407 | 0.384 | 1.427 | 1.445 | 1.617 |
| Gdi1      | Up   | 0.0221    | 0.752 | 0.904 | 0.682 | 1.101 | 1.415 | 1.088 |
| Ctsb      | Up   | 0.00514   | 0.851 | 0.61  | 0.727 | 1.298 | 1.263 | 1.198 |
| Slc25a4   | Down | 0.0115    | 1.345 | 1.126 | 2.375 | 0.602 | 0.53  | 0.543 |
| Fh        | Down | 0.0273    | 1.445 | 1.015 | 1.314 | 0.873 | 0.867 | 0.712 |
| Vdac1     | Down | 0.0143    | 1.415 | 1.067 | 1.774 | 0.782 | 0.744 | 0.646 |
| Pzp       | Up   | 0.00572   | 0.659 | 0.698 | 0.485 | 1.205 | 1.203 | 1.57  |
| Ldb3      | Down | 0.0338    | 1.223 | 1.187 | 1.95  | 0.6   | 0.61  | 0.6   |
| Sod3      | Up   | 0.046     | 0.42  | 0.763 | 0.561 | 1.63  | 1.675 | 0.812 |
| Sptb      | Down | 0.0045    | 1.362 | 1.291 | 1.239 | 0.913 | 0.701 | 0.707 |
| Gstm2     | Up   | 0.024     | 0.611 | 0.855 | 0.738 | 1.213 | 1.497 | 1.019 |
| Hp        | Up   | 0.000978  | 0.399 | 0.4   | 0.314 | 1.257 | 1.331 | 1.959 |
| Aebp1     | Up   | 0.0251    | 0.593 | 0.875 | 0.714 | 1.314 | 1.351 | 0.994 |
| Tnnc2     | Down | 0.000401  | 2.458 | 1.346 | 2.45  | 0.227 | 0.178 | 0.188 |
| Prelp     | Up   | 0.00284   | 0.618 | 0.795 | 0.74  | 1.144 | 1.25  | 1.285 |
| Ckmt2     | Down | 0.0199    | 1.623 | 0.918 | 2.836 | 0.551 | 0.377 | 0.276 |
| F13a1     | Up   | 0.0062    | 0.717 | 0.682 | 0.482 | 1.237 | 1.205 | 1.492 |
| Ace       | Up   | 0.0086    | 0.462 | 0.673 | 0.611 | 1.535 | 1.6   | 1.032 |
| Efemp1    | Up   | 0.0251    | 0.582 | 0.923 | 0.724 | 1.275 | 1.32  | 1.078 |
| Apoa4     | Up   | 0.000883  | 0.527 | 0.592 | 0.477 | 1.278 | 1.272 | 1.666 |
| Serpina1b | Up   | 0.000445  | 0.754 | 0.726 | 0.657 | 1.105 | 1.169 | 1.169 |
| Ncam1     | Up   | 0.0146    | 0.718 | 0.886 | 0.768 | 1.264 | 1.302 | 1.017 |
| Serpina3k | Up   | 0.00994   | 0.716 | 0.873 | 0.626 | 1.107 | 1.172 | 1.249 |
| Tpm4      | Up   | 0.00838   | 0.754 | 0.74  | 0.522 | 1.435 | 1.157 | 1.25  |
| Pgam2     | Down | 0.0392    | 1.432 | 0.956 | 3.405 | 0.278 | 0.269 | 0.247 |



|               |      |           |       |       |       |       |       |       |
|---------------|------|-----------|-------|-------|-------|-------|-------|-------|
| Ctsd          | Up   | 0.0022    | 0.78  | 0.67  | 0.73  | 1.358 | 1.314 | 1.103 |
| Itgav         | Up   | 0.0144    | 0.6   | 0.86  | 0.678 | 1.285 | 1.446 | 1.06  |
| Nnt           | Down | 0.00406   | 1.376 | 1.423 | 2.404 | 0.565 | 0.375 | 0.355 |
| Suclg1        | Down | 0.0328    | 1.533 | 1.072 | 1.275 | 0.867 | 0.881 | 0.618 |
| Cdh13         | Up   | 0.0321    | 0.626 | 0.963 | 0.795 | 1.219 | 1.254 | 1.106 |
| Tnc           | Up   | 0.00458   | 0.574 | 0.677 | 0.566 | 1.557 | 1.44  | 1.037 |
| Ighm          | Up   | 0.00144   | 0.597 | 0.487 | 0.514 | 1.21  | 1.259 | 1.686 |
| Gc            | Up   | 0.000643  | 0.6   | 0.603 | 0.517 | 1.187 | 1.383 | 1.533 |
| Cycs          | Down | 0.0392    | 1.56  | 0.967 | 1.544 | 0.845 | 0.831 | 0.639 |
| Serpina<br>1e | Up   | 0.00186   | 0.424 | 0.5   | 0.323 | 1.213 | 1.383 | 1.803 |
| Cd163         | Up   | 0.000856  | 0.635 | 0.772 | 0.626 | 1.245 | 1.346 | 1.264 |
| Hadh          | Down | 0.0395    | 1.658 | 1.074 | 1.168 | 0.851 | 0.893 | 0.787 |
| Fgg           | Up   | 0.0191    | 0.86  | 0.72  | 0.484 | 1.356 | 1.199 | 1.348 |
| Fbln2         | Up   | 0.0118    | 0.682 | 0.857 | 0.799 | 1.344 | 1.286 | 1.045 |
| Anxa4         | Up   | 0.000955  | 0.641 | 0.755 | 0.69  | 1.276 | 1.376 | 1.157 |
| Knlg1         | Up   | 0.0013    | 0.509 | 0.558 | 0.489 | 1.16  | 1.353 | 1.733 |
| C4b           | Up   | 0.00154   | 0.831 | 0.737 | 0.687 | 1.174 | 1.219 | 1.317 |
| Idh3g         | Down | 0.0101    | 1.337 | 1.082 | 1.394 | 0.851 | 0.867 | 0.727 |
| Anxa7         | Up   | 0.0125    | 0.687 | 0.888 | 0.726 | 1.209 | 1.38  | 1.068 |
| Dlst          | Down | 0.0159    | 1.418 | 1.096 | 1.263 | 0.911 | 0.832 | 0.694 |
| Pbxip1        | Down | 0.0284    | 0.963 | 1.593 | 1.827 | 0.752 | 0.74  | 0.547 |
| Cpt1b         | Down | 0.0482    | 1.549 | 1.183 | 1.67  | 0.863 | 0.831 | 0.381 |
| Itih4         | Up   | 0.0000625 | 0.505 | 0.586 | 0.496 | 1.368 | 1.465 | 1.394 |
| Igkc          | Up   | 0.0018    | 0.704 | 0.731 | 0.668 | 1.12  | 1.211 | 1.439 |
| Tnni2         | Down | 0.000203  | 2.466 | 1.441 | 2.237 | 0.204 | 0.191 | 0.232 |
| Rbp1          | Up   | 0.0328    | 0.519 | 0.819 | 0.66  | 1.251 | 1.712 | 0.977 |
| Ppa1          | Up   | 0.033     | 0.832 | 0.684 | 0.709 | 0.985 | 1.111 | 1.561 |
| Plg           | Up   | 0.00262   | 0.69  | 0.814 | 0.675 | 1.174 | 1.195 | 1.406 |
| Itih1         | Up   | 0.000761  | 0.586 | 0.636 | 0.726 | 1.461 | 1.342 | 1.235 |
| Casq1         | Down | 0.00182   | 1.8   | 1.145 | 2.833 | 0.279 | 0.251 | 0.242 |
| Ahsg          | Up   | 0.00146   | 0.617 | 0.581 | 0.491 | 1.161 | 1.337 | 1.584 |
| Cd36          | Down | 0.0368    | 1.55  | 1.15  | 1.111 | 0.727 | 0.661 | 0.97  |
| Atp5h         | Down | 0.0468    | 1.254 | 0.968 | 1.571 | 0.819 | 0.718 | 0.884 |
| Cox6b1        | Down | 0.0354    | 1.451 | 0.992 | 1.392 | 0.898 | 0.855 | 0.725 |
| Clu           | Up   | 0.0000162 | 0.512 | 0.576 | 0.529 | 1.394 | 1.367 | 1.406 |
| Vcan          | Up   | 0.0284    | 0.538 | 0.869 | 0.778 | 1.428 | 1.257 | 1.079 |
| Vat1          | Up   | 0.0026    | 0.765 | 0.851 | 0.679 | 1.214 | 1.259 | 1.161 |
| Pdhx          | Down | 0.00514   | 1.401 | 1.097 | 1.295 | 0.859 | 0.823 | 0.785 |
| Myoz1         | Down | 0.00538   | 2.777 | 1.42  | 1.193 | 0.409 | 0.348 | 0.424 |
| Itga5         | Up   | 0.0272    | 0.64  | 0.916 | 0.7   | 1.364 | 1.399 | 1.006 |
| Ren2          | Up   | 0.042     | 0.654 | 0.892 | 0.752 | 1.371 | 1.34  | 0.932 |
| Ddah2         | Up   | 0.00968   | 0.647 | 0.903 | 0.719 | 1.17  | 1.293 | 1.177 |

|               |      |          |       |       |       |       |       |       |
|---------------|------|----------|-------|-------|-------|-------|-------|-------|
| Naalad<br>2   | Up   | 0.000244 | 0.683 | 0.77  | 0.753 | 1.179 | 1.254 | 1.217 |
| Inmt          | Up   | 0.0107   | 0.597 | 0.665 | 0.526 | 1.05  | 1.166 | 1.766 |
| Vdac2         | Down | 0.0339   | 1.173 | 1.147 | 1.491 | 0.824 | 0.799 | 0.794 |
| Gstm7         | Up   | 0.0349   | 0.411 | 0.732 | 0.611 | 1.27  | 2.002 | 0.957 |
| F2            | Up   | 0.0024   | 0.626 | 0.768 | 0.533 | 1.271 | 1.357 | 1.351 |
| Cox4i1        | Down | 0.00856  | 1.563 | 1.097 | 1.671 | 0.787 | 0.68  | 0.606 |
| Grn           | Up   | 0.00142  | 0.686 | 0.556 | 0.662 | 1.336 | 1.168 | 1.476 |
| Mybph         | Down | 0.0302   | 1.408 | 1.197 | 2.897 | 0.371 | 0.348 | 0.379 |
| Ampd1         | Down | 0.0425   | 1.324 | 1.04  | 3.329 | 0.329 | 0.302 | 0.31  |
| Uqcrfs<br>1   | Down | 0.022    | 1.412 | 1.041 | 1.428 | 0.932 | 0.8   | 0.778 |
| Tnnt3         | Down | 0.000724 | 2.572 | 1.218 | 1.954 | 0.223 | 0.178 | 0.149 |
| Gys1          | Down | 0.0183   | 1.428 | 1.003 | 1.86  | 0.631 | 0.656 | 0.749 |
| Fbln1         | Up   | 0.0071   | 0.578 | 0.825 | 0.701 | 1.205 | 1.198 | 1.45  |
| Vdac3         | Down | 0.0054   | 1.322 | 1.132 | 1.658 | 0.767 | 0.681 | 0.699 |
| Ndufa4        | Down | 0.0144   | 1.487 | 1.093 | 1.382 | 0.873 | 0.802 | 0.646 |
| Aspn          | Up   | 0.000521 | 0.541 | 0.669 | 0.597 | 1.436 | 1.423 | 1.225 |
| Atp5f1        | Down | 0.0352   | 1.27  | 0.993 | 1.55  | 0.817 | 0.758 | 0.881 |
| Ndufs3        | Down | 0.00306  | 1.261 | 1.114 | 1.356 | 0.872 | 0.812 | 0.802 |
| Rnase4        | Up   | 0.00152  | 0.524 | 0.63  | 0.543 | 1.404 | 1.595 | 1.134 |
| Tubb1         | Down | 0.0356   | 1.361 | 1.629 | 0.939 | 0.811 | 0.742 | 0.739 |
| Cfb           | Up   | 0.00118  | 0.6   | 0.74  | 0.571 | 1.37  | 1.37  | 1.216 |
| Capg          | Up   | 0.00114  | 0.783 | 0.65  | 0.774 | 1.302 | 1.222 | 1.219 |
| Vcam1         | Up   | 0.0072   | 0.53  | 0.588 | 0.475 | 1.857 | 1.445 | 0.997 |
| Serpinf<br>1  | Up   | 0.00748  | 0.509 | 0.831 | 0.565 | 1.413 | 1.398 | 1.238 |
| Apoh          | Up   | 0.0146   | 0.779 | 0.903 | 0.636 | 1.291 | 1.12  | 1.2   |
| Trim72        | Down | 0.0379   | 1.284 | 0.96  | 2.456 | 0.702 | 0.578 | 0.514 |
| Crk           | Up   | 0.0284   | 0.691 | 0.925 | 0.698 | 1.202 | 1.409 | 1.017 |
| Uqcrb         | Down | 0.00994  | 1.506 | 1.081 | 1.387 | 0.799 | 0.823 | 0.673 |
| Nipsna<br>p2  | Down | 0.0384   | 1.285 | 0.982 | 2.142 | 0.713 | 0.632 | 0.72  |
| Phka1         | Down | 0.0125   | 1.284 | 1.136 | 2.663 | 0.439 | 0.472 | 0.545 |
| Hexb          | Up   | 0.000696 | 0.757 | 0.713 | 0.759 | 1.313 | 1.262 | 1.116 |
| Clec3b        | Up   | 0.03     | 0.543 | 0.929 | 0.623 | 1.103 | 1.195 | 1.512 |
| Smoc1         | Up   | 0.0204   | 0.626 | 0.784 | 0.797 | 1.328 | 1.454 | 0.984 |
| Slc25a<br>1   | Down | 0.0138   | 1.442 | 1.215 | 1.174 | 0.701 | 0.736 | 0.951 |
| Gda           | Up   | 0.00756  | 0.797 | 0.621 | 0.64  | 1.253 | 1.07  | 1.483 |
| Icam1         | Up   | 0.00514  | 0.765 | 0.713 | 0.647 | 1.357 | 1.327 | 1.034 |
| Serpina<br>3n | Up   | 0.000824 | 0.497 | 0.531 | 0.603 | 1.465 | 1.598 | 1.185 |

|              |      |           |       |       |       |       |       |       |
|--------------|------|-----------|-------|-------|-------|-------|-------|-------|
| Mpst         | Down | 0.00442   | 1.423 | 1.158 | 1.297 | 0.778 | 0.683 | 0.858 |
| Uchl1        | Up   | 0.00346   | 0.528 | 0.691 | 0.586 | 1.331 | 1.642 | 1.137 |
| Htra1        | Up   | 0.0172    | 0.448 | 0.829 | 0.53  | 1.579 | 1.341 | 1.107 |
| Entpd2       | Up   | 0.0109    | 0.588 | 0.862 | 0.663 | 1.121 | 1.431 | 1.259 |
| Ctsh         | Up   | 0.000536  | 0.719 | 0.713 | 0.662 | 1.406 | 1.347 | 1.169 |
| Ecm1         | Up   | 0.00356   | 0.712 | 0.802 | 0.74  | 1.458 | 1.299 | 1.108 |
| C8a          | Up   | 0.00194   | 0.749 | 0.755 | 0.596 | 1.396 | 1.262 | 1.237 |
| Coq9         | Down | 0.0175    | 1.249 | 1.014 | 1.453 | 0.851 | 0.775 | 0.786 |
| Emilin<br>2  | Up   | 0.0035    | 0.647 | 0.7   | 0.7   | 1.349 | 1.047 | 1.437 |
| Slc25a<br>11 | Down | 0.0172    | 1.34  | 1.021 | 1.566 | 0.824 | 0.767 | 0.751 |
| Slc25a<br>10 | Down | 0.0048    | 1.462 | 1.169 | 1.304 | 0.683 | 0.718 | 0.868 |
| Cd200        | Up   | 0.014     | 0.577 | 0.579 | 0.653 | 1.55  | 1.763 | 0.938 |
| Itgam        | Up   | 0.0081    | 0.845 | 0.591 | 0.699 | 1.327 | 1.12  | 1.346 |
| Nucb2        | Up   | 0.0033    | 0.683 | 0.854 | 0.805 | 1.271 | 1.26  | 1.159 |
| Smyd1        | Down | 0.0414    | 1.344 | 1.099 | 2.876 | 0.389 | 0.411 | 0.402 |
| Coq8a        | Down | 0.0326    | 1.29  | 1.054 | 1.659 | 0.845 | 0.875 | 0.655 |
| Cd34         | Up   | 0.0215    | 0.671 | 0.89  | 0.803 | 1.194 | 1.356 | 1.034 |
| Cd109        | Up   | 0.0277    | 0.468 | 0.765 | 0.617 | 1.539 | 1.586 | 0.916 |
| Stab1        | Up   | 0.0000191 | 0.749 | 0.725 | 0.729 | 1.208 | 1.233 | 1.291 |
| Scpep1       | Up   | 0.00592   | 0.765 | 0.823 | 0.677 | 1.3   | 1.343 | 1.066 |
| Csad         | Up   | 0.0134    | 0.859 | 0.796 | 0.633 | 1.133 | 1.394 | 1.153 |
| Nebl         | Up   | 0.0167    | 0.704 | 0.743 | 0.796 | 1.403 | 1.521 | 0.989 |
| Ctsz         | Up   | 0.00772   | 0.822 | 0.558 | 0.732 | 1.321 | 1.286 | 1.177 |
| Klhl41       | Down | 0.03      | 1.59  | 1.183 | 2.694 | 0.442 | 0.452 | 0.427 |
| Scarb2       | Up   | 0.0000842 | 0.527 | 0.573 | 0.603 | 1.382 | 1.438 | 1.265 |
| Igh-3        | Up   | 0.000942  | 0.759 | 0.752 | 0.73  | 1.156 | 1.179 | 1.381 |
| Cpa3         | Up   | 0.0203    | 0.851 | 0.751 | 0.609 | 1.086 | 1.15  | 1.51  |
| Lgals3       | Up   | 0.0011    | 0.822 | 0.672 | 0.711 | 1.254 | 1.21  | 1.31  |
| Mfge8        | Up   | 0.0161    | 0.748 | 0.825 | 0.575 | 1.535 | 1.134 | 1.162 |
| Dpep1        | Up   | 0.00284   | 0.613 | 0.818 | 0.667 | 1.189 | 1.338 | 1.284 |
| Ctsc         | Up   | 0.00478   | 0.824 | 0.594 | 0.727 | 1.257 | 1.182 | 1.256 |
| Dab2         | Up   | 0.0067    | 0.78  | 0.693 | 0.759 | 1.172 | 1.078 | 1.459 |
| Ambp         | Up   | 0.000257  | 0.433 | 0.465 | 0.434 | 1.255 | 1.421 | 1.734 |
| Col28a<br>1  | Up   | 0.00692   | 0.737 | 0.596 | 0.558 | 1.066 | 1.264 | 1.575 |
| Itih3        | Up   | 0.001     | 0.528 | 0.597 | 0.518 | 1.173 | 1.256 | 1.596 |
| Uqcr10       | Down | 0.0248    | 1.435 | 1.024 | 1.487 | 0.848 | 0.888 | 0.766 |
| Mylk2        | Down | 0.0206    | 1.315 | 0.991 | 2.894 | 0.507 | 0.48  | 0.392 |
| Cisd1        | Down | 0.0119    | 1.266 | 1.069 | 1.506 | 0.847 | 0.811 | 0.775 |

|              |      |          |       |       |       |       |       |       |
|--------------|------|----------|-------|-------|-------|-------|-------|-------|
| Ppp1r3<br>a  | Down | 0.00838  | 1.572 | 1.018 | 3.022 | 0.335 | 0.321 | 0.405 |
| Ndufa2       | Down | 0.00954  | 1.425 | 1.069 | 1.38  | 0.862 | 0.787 | 0.725 |
| Myot         | Down | 0.0192   | 1.903 | 1.124 | 2.66  | 0.31  | 0.294 | 0.291 |
| Efemp2       | Up   | 0.025    | 0.521 | 0.747 | 0.618 | 1.455 | 1.642 | 0.905 |
| Cfd          | Up   | 0.0023   | 0.711 | 0.725 | 0.74  | 1.061 | 1.185 | 1.358 |
| C4bpa        | Up   | 0.00116  | 0.447 | 0.404 | 0.392 | 1.67  | 1.638 | 1.073 |
| Fth1         | Up   | 0.0105   | 0.675 | 0.553 | 0.51  | 1.022 | 1.225 | 1.756 |
| Cfp          | Up   | 0.00172  | 0.442 | 0.388 | 0.352 | 2.039 | 1.596 | 1.13  |
| Th           | Up   | 0.0289   | 0.675 | 0.69  | 0.86  | 1.017 | 1.174 | 1.614 |
| Marcks       | Up   | 0.00966  | 0.864 | 0.696 | 0.755 | 1.146 | 1.093 | 1.386 |
| Ftl1         | Up   | 0.032    | 0.738 | 0.436 | 0.533 | 0.955 | 1.185 | 1.982 |
| Clec10<br>a  | Up   | 0.00878  | 0.754 | 0.611 | 0.529 | 1.281 | 1.09  | 1.631 |
| Tpm2         | Down | 0.00024  | 2.772 | 1.45  | 1.831 | 0.187 | 0.163 | 0.157 |
| Rab6b        | Up   | 0.000936 | 0.636 | 0.702 | 0.772 | 1.375 | 1.261 | 1.202 |
| Itih2        | Up   | 0.00396  | 0.669 | 0.812 | 0.569 | 1.254 | 1.229 | 1.34  |
| Gstt1        | Up   | 0.00328  | 0.683 | 0.829 | 0.674 | 1.118 | 1.288 | 1.33  |
| Top2b        | Down | 0.0035   | 1.551 | 1.323 | 1.187 | 0.692 | 0.623 | 0.798 |
| Vwa1         | Up   | 0.00178  | 0.746 | 0.718 | 0.679 | 1.355 | 1.292 | 1.08  |
| Basp1        | Up   | 0.0246   | 0.984 | 0.681 | 0.633 | 1.197 | 1.183 | 1.344 |
| Tecr         | Down | 0.011    | 1.495 | 1.095 | 1.485 | 0.651 | 0.614 | 0.858 |
| Hrg          | Up   | 0.000702 | 0.484 | 0.579 | 0.537 | 1.273 | 1.294 | 1.674 |
| Dpp7         | Up   | 0.000178 | 0.76  | 0.824 | 0.787 | 1.181 | 1.233 | 1.154 |
| Ltbp2        | Up   | 0.0185   | 0.611 | 0.789 | 0.728 | 1.573 | 1.251 | 1.004 |
| Itgb5        | Up   | 0.00684  | 0.481 | 0.765 | 0.556 | 1.378 | 1.548 | 1.153 |
| Ifi204       | Up   | 0.0242   | 0.856 | 0.546 | 0.647 | 1.196 | 1.066 | 1.625 |
| Camk2<br>a   | Down | 0.00416  | 1.568 | 1.141 | 3.054 | 0.289 | 0.293 | 0.346 |
| Ctsa         | Up   | 0.0239   | 0.986 | 0.691 | 0.739 | 1.284 | 1.257 | 1.104 |
| Serpind<br>1 | Up   | 0.0105   | 0.474 | 0.676 | 0.603 | 1.058 | 1.242 | 1.752 |
| Gaa          | Up   | 0.000878 | 0.78  | 0.809 | 0.78  | 1.252 | 1.331 | 1.127 |
| Serping<br>1 | Up   | 0.000856 | 0.645 | 0.729 | 0.667 | 1.147 | 1.274 | 1.41  |
| Rbbp7        | Down | 0.0162   | 1.288 | 1.04  | 1.534 | 0.776 | 0.823 | 0.82  |
| Acan         | Up   | 0.0363   | 0.442 | 0.597 | 0.616 | 1.828 | 1.696 | 0.783 |
| Spep         | Down | 0.0482   | 1.309 | 1.099 | 1.951 | 0.687 | 0.634 | 0.673 |
| Steap3       | Up   | 0.00756  | 0.729 | 0.866 | 0.768 | 1.262 | 1.063 | 1.356 |
| Cbr3         | Up   | 0.000281 | 0.655 | 0.753 | 0.752 | 1.308 | 1.255 | 1.262 |
| Arl8a        | Up   | 0.000935 | 0.688 | 0.816 | 0.672 | 1.221 | 1.299 | 1.286 |
| Npnt         | Up   | 0.0262   | 0.584 | 0.949 | 0.696 | 1.313 | 1.303 | 1.099 |
| Ndufb9       | Down | 0.00908  | 1.384 | 1.051 | 1.303 | 0.841 | 0.84  | 0.806 |

|          |      |           |       |       |       |       |       |       |
|----------|------|-----------|-------|-------|-------|-------|-------|-------|
| Cd5l     | Up   | 0.0000176 | 0.354 | 0.369 | 0.305 | 1.603 | 1.628 | 1.522 |
| Mfap5    | Up   | 0.0124    | 0.791 | 0.661 | 0.541 | 1.495 | 1.037 | 1.399 |
| Reck     | Up   | 0.0435    | 0.574 | 0.927 | 0.795 | 1.241 | 1.384 | 1.037 |
| Tcof1    | Down | 0.01      | 1.356 | 1.037 | 1.337 | 0.826 | 0.793 | 0.841 |
| Pdk4     | Down | 0.0152    | 1.767 | 1.217 | 1.287 | 0.827 | 0.763 | 0.552 |
| Saa2     | Up   | 0.0332    | 0.266 | 0.279 | 0.292 | 2.226 | 0.799 | 1.703 |
| C9       | Up   | 0.0000952 | 0.682 | 0.717 | 0.653 | 1.367 | 1.242 | 1.266 |
| C5       | Up   | 0.000242  | 0.52  | 0.62  | 0.489 | 1.422 | 1.352 | 1.315 |
| Ctsl     | Up   | 0.000437  | 0.693 | 0.735 | 0.609 | 1.356 | 1.281 | 1.249 |
| Apcs     | Up   | 0.00058   | 0.422 | 0.305 | 0.429 | 1.283 | 1.687 | 1.598 |
| Cox7c    | Down | 0.00974   | 1.428 | 1.085 | 1.832 | 0.696 | 0.566 | 0.704 |
| Akr1b8   | Up   | 0.000363  | 0.776 | 0.839 | 0.75  | 1.183 | 1.249 | 1.18  |
| Atp6v0d1 | Up   | 0.00108   | 0.802 | 0.779 | 0.697 | 1.253 | 1.151 | 1.319 |
| Cacna1s  | Down | 0.0316    | 1.572 | 1.124 | 2.894 | 0.362 | 0.398 | 0.358 |
| Ugt1a7c  | Up   | 0.00496   | 0.637 | 0.53  | 0.625 | 1.287 | 1.08  | 1.693 |
| Asrgl1   | Down | 0.0032    | 1.25  | 1.153 | 1.476 | 0.784 | 0.774 | 0.831 |
| Cacnb1   | Down | 0.0371    | 1.475 | 1.106 | 2.777 | 0.436 | 0.411 | 0.407 |
| Ndufa6   | Down | 0.00242   | 1.26  | 1.137 | 1.413 | 0.824 | 0.793 | 0.831 |
| Mpc2     | Down | 0.000776  | 1.429 | 1.238 | 1.583 | 0.711 | 0.67  | 0.729 |
| Ggt5     | Up   | 0.00622   | 0.788 | 0.69  | 0.821 | 1.137 | 1.149 | 1.425 |
| Alyref   | Down | 0.00144   | 1.373 | 1.147 | 1.378 | 0.817 | 0.776 | 0.789 |
| Anxa8    | Up   | 0.0118    | 0.755 | 0.881 | 0.664 | 1.078 | 1.222 | 1.367 |
| Lgmn     | Up   | 0.00702   | 0.895 | 0.705 | 0.804 | 1.317 | 1.222 | 1.122 |
| App      | Up   | 0.045     | 0.457 | 0.726 | 0.549 | 1.587 | 1.809 | 0.787 |
| Gba      | Up   | 0.0000769 | 0.815 | 0.759 | 0.758 | 1.239 | 1.19  | 1.223 |
| Rcn1     | Up   | 0.00348   | 0.729 | 0.882 | 0.739 | 1.247 | 1.213 | 1.124 |
| Fcgrt    | Up   | 0.000505  | 0.764 | 0.823 | 0.764 | 1.311 | 1.186 | 1.172 |
| Islr     | Up   | 0.0431    | 0.672 | 0.929 | 0.796 | 1.307 | 1.324 | 0.968 |
| Atl2     | Down | 0.0351    | 1.207 | 1.025 | 1.574 | 0.832 | 0.884 | 0.78  |
| C8b      | Up   | 0.000582  | 0.619 | 0.708 | 0.561 | 1.424 | 1.259 | 1.324 |
| Abca9    | Up   | 0.000204  | 0.713 | 0.738 | 0.654 | 1.22  | 1.241 | 1.338 |
| Uap1     | Up   | 0.0013    | 0.815 | 0.843 | 0.721 | 1.238 | 1.157 | 1.248 |
| Jph1     | Down | 0.0304    | 1.618 | 1.091 | 2.966 | 0.333 | 0.359 | 0.319 |
| Tmod4    | Down | 0.00066   | 1.954 | 1.302 | 1.845 | 0.491 | 0.444 | 0.492 |
| Apobec2  | Down | 0.0271    | 1.411 | 1.207 | 3.236 | 0.291 | 0.259 | 0.294 |
| Trdn     | Down | 0.0168    | 1.509 | 1.003 | 2.375 | 0.574 | 0.52  | 0.602 |
| Rtn2     | Down | 0.0207    | 1.301 | 1.011 | 2.831 | 0.532 | 0.488 | 0.423 |
| Emp2     | Up   | 0.0383    | 0.548 | 0.885 | 0.85  | 1.267 | 1.229 | 1.119 |
| Abcb1b   | Up   | 0.0306    | 0.607 | 0.607 | 0.801 | 1.178 | 1.779 | 0.985 |



|               |      |           |       |       |       |       |       |       |
|---------------|------|-----------|-------|-------|-------|-------|-------|-------|
| Tmod1         | Down | 0.0000556 | 1.906 | 1.534 | 1.604 | 0.494 | 0.477 | 0.47  |
| Golga3        | Up   | 0.00382   | 0.725 | 0.849 | 0.674 | 1.121 | 1.255 | 1.311 |
| Mp68          | Down | 0.0157    | 1.349 | 1.035 | 1.498 | 0.781 | 0.743 | 0.862 |
| Chl1          | Up   | 0.0374    | 0.866 | 0.82  | 0.678 | 1.11  | 1.011 | 1.462 |
| Nfix          | Down | 0.0389    | 1.068 | 1.163 | 2.088 | 0.56  | 0.645 | 0.822 |
| Tmem3<br>8a   | Down | 0.00472   | 1.54  | 1.083 | 3.416 | 0.279 | 0.25  | 0.22  |
| Fhod1         | Down | 0.00312   | 1.358 | 1.173 | 1.643 | 0.763 | 0.695 | 0.706 |
| Mtch2         | Down | 0.000279  | 1.298 | 1.165 | 1.276 | 0.834 | 0.808 | 0.808 |
| Naprt         | Up   | 0.00296   | 0.749 | 0.822 | 0.802 | 1.067 | 1.288 | 1.241 |
| Dhrs7c        | Down | 0.00644   | 1.298 | 1.139 | 3.036 | 0.355 | 0.326 | 0.286 |
| Rab11f<br>ip5 | Down | 0.00656   | 1.456 | 1.119 | 1.454 | 0.812 | 0.811 | 0.672 |
| Pofut2        | Up   | 0.0304    | 0.616 | 0.875 | 0.807 | 1.326 | 1.373 | 1.002 |
| Dap           | Up   | 0.0102    | 0.652 | 0.779 | 0.596 | 1.265 | 1.589 | 1.057 |
| Ppif          | Down | 0.0464    | 1.486 | 0.938 | 1.433 | 0.877 | 0.81  | 0.754 |
| Ndufa3        | Down | 0.025     | 1.196 | 1.03  | 1.521 | 0.859 | 0.821 | 0.781 |
| Sdhc          | Down | 0.0139    | 1.302 | 1.084 | 1.617 | 0.759 | 0.809 | 0.836 |
| Nop56         | Down | 0.00264   | 1.453 | 1.178 | 1.528 | 0.744 | 0.619 | 0.75  |
| Fetub         | Up   | 0.000337  | 0.559 | 0.494 | 0.535 | 1.234 | 1.398 | 1.614 |
| Endog         | Down | 0.0158    | 1.485 | 1.022 | 1.746 | 0.737 | 0.753 | 0.642 |
| Saa1          | Up   | 0.0000976 | 0.435 | 0.485 | 0.455 | 1.281 | 1.574 | 1.555 |
| Mmp2          | Up   | 0.0193    | 0.36  | 0.844 | 0.393 | 1.566 | 1.341 | 1.311 |
| Mypn          | Down | 0.022     | 1.402 | 0.992 | 2.441 | 0.602 | 0.471 | 0.598 |
| Gas7          | Up   | 0.0127    | 0.771 | 0.697 | 0.459 | 1.349 | 1.156 | 1.439 |
| Surf4         | Down | 0.00622   | 1.41  | 1.133 | 1.81  | 0.711 | 0.62  | 0.697 |
| Gns           | Up   | 0.00226   | 0.791 | 0.686 | 0.702 | 1.326 | 1.326 | 1.094 |
| Ganc          | Down | 0.0239    | 1.433 | 1.119 | 1.304 | 0.795 | 0.821 | 0.8   |
| Ufl1          | Down | 0.00316   | 1.239 | 1.15  | 1.451 | 0.841 | 0.803 | 0.784 |
| Gfm2          | Down | 0.0139    | 1.189 | 1.158 | 1.409 | 0.849 | 0.706 | 0.922 |
| Ces2c         | Up   | 0.0018    | 0.728 | 0.792 | 0.736 | 1.289 | 1.336 | 1.093 |
| Cisd2         | Down | 0.00706   | 1.367 | 1.091 | 1.538 | 0.816 | 0.768 | 0.734 |
| Ndufb3        | Down | 0.0168    | 1.413 | 1.032 | 1.345 | 0.857 | 0.728 | 0.846 |
| Arpin         | Up   | 0.0263    | 0.741 | 0.885 | 0.694 | 1.154 | 1.403 | 0.997 |
| Cul2          | Down | 0.0129    | 1.271 | 1.103 | 1.396 | 0.94  | 0.813 | 0.745 |
| Osbpl3        | Down | 0.0147    | 1.078 | 1.277 | 1.723 | 0.671 | 0.763 | 0.778 |
| Pdk2          | Down | 0.0143    | 1.269 | 1.067 | 1.586 | 0.819 | 0.806 | 0.752 |
| Matn2         | Up   | 0.0044    | 0.737 | 0.742 | 0.688 | 1.253 | 1.058 | 1.447 |
| Rbbp9         | Up   | 0.0167    | 0.757 | 0.867 | 0.767 | 1.149 | 1.434 | 1.044 |
| Sypl2         | Down | 0.006     | 1.403 | 1.035 | 3.721 | 0.255 | 0.189 | 0.199 |
| Mt2           | Up   | 0.0000815 | 0.273 | 0.281 | 0.292 | 1.32  | 1.893 | 1.638 |
| Orm2          | Up   | 0.00408   | 0.423 | 0.347 | 0.545 | 1.122 | 1.388 | 1.923 |
| Fcgr2         | Up   | 0.00536   | 0.539 | 0.631 | 0.512 | 1.285 | 1.069 | 1.769 |

|              |      |           |       |       |       |       |       |       |
|--------------|------|-----------|-------|-------|-------|-------|-------|-------|
| Apoe         | Down | 0.000161  | 1.984 | 1.553 | 1.646 | 0.498 | 0.397 | 0.437 |
| F9           | Up   | 0.025     | 0.67  | 0.667 | 0.729 | 1.358 | 1.543 | 0.895 |
| Cyr61        | Up   | 0.0146    | 0.718 | 0.844 | 0.779 | 1.376 | 1.278 | 1.002 |
| Ang          | Up   | 0.000238  | 0.473 | 0.599 | 0.545 | 1.367 | 1.51  | 1.351 |
| Mmp3         | Up   | 0.0186    | 0.548 | 0.617 | 0.706 | 1.011 | 1.152 | 1.798 |
| Vtn          | Up   | 0.00406   | 0.622 | 0.61  | 0.52  | 1.344 | 1.075 | 1.683 |
| Saa4         | Up   | 0.0024    | 0.609 | 0.638 | 0.451 | 1.235 | 1.302 | 1.563 |
| Apoc1        | Up   | 0.0222    | 0.712 | 0.828 | 0.488 | 1.414 | 1.277 | 1.08  |
| Mbl1         | Up   | 0.0144    | 0.538 | 0.599 | 0.755 | 1.643 | 1.427 | 0.988 |
| Ephb2        | Down | 0.0169    | 1.268 | 1.058 | 1.513 | 0.887 | 0.767 | 0.789 |
| Pltp         | Up   | 0.000182  | 0.643 | 0.646 | 0.709 | 1.224 | 1.285 | 1.399 |
| Cox7a1       | Down | 0.043     | 1.739 | 1.087 | 1.963 | 0.748 | 0.701 | 0.275 |
| Ncstn        | Up   | 0.00562   | 0.81  | 0.867 | 0.658 | 1.254 | 1.222 | 1.189 |
| Rap2b        | Up   | 0.000402  | 0.768 | 0.795 | 0.732 | 1.152 | 1.206 | 1.301 |
| Rps15        | Down | 0.0202    | 1.571 | 1.011 | 1.455 | 0.841 | 0.765 | 0.698 |
| Mpc1         | Down | 0.0000437 | 1.267 | 1.205 | 1.233 | 0.774 | 0.793 | 0.739 |
| Nsun2        | Down | 0.0435    | 1.406 | 1.115 | 1.232 | 0.627 | 0.929 | 0.923 |
| Jsrp1        | Down | 0.00436   | 1.717 | 1.075 | 3.015 | 0.278 | 0.285 | 0.342 |
| Plcl1        | Down | 0.00718   | 2.005 | 1.16  | 3.505 | 0.198 | 0.028 | 0.032 |
| Plch1        | Down | 0.0189    | 1.439 | 1.132 | 1.387 | 0.911 | 0.828 | 0.62  |
| Gas6         | Up   | 0.0185    | 0.54  | 0.763 | 0.582 | 1.338 | 1.332 | 1.322 |
| Azgp1        | Up   | 0.0094    | 0.586 | 0.87  | 0.553 | 1.261 | 1.366 | 1.256 |
| Pcp4l1       | Up   | 0.0305    | 0.486 | 0.929 | 0.557 | 1.268 | 1.525 | 1.109 |
| Ankib1       | Down | 0.0458    | 1.681 | 0.898 | 3     | 0.353 | 0.319 | 0.353 |
| Cmya5        | Down | 0.0272    | 1.227 | 1.007 | 2.736 | 0.49  | 0.584 | 0.493 |
| Enoph1       | Up   | 0.000799  | 0.775 | 0.756 | 0.826 | 1.115 | 1.245 | 1.259 |
| Pgghg        | Up   | 0.00106   | 0.697 | 0.74  | 0.689 | 1.257 | 1.404 | 1.125 |
| Osbp12       | Up   | 0.00166   | 0.695 | 0.748 | 0.615 | 1.145 | 1.288 | 1.408 |
| Aida         | Up   | 0.0237    | 0.71  | 0.988 | 0.684 | 1.235 | 1.192 | 1.154 |
| C1sa         | Up   | 0.000204  | 0.738 | 0.704 | 0.647 | 1.314 | 1.211 | 1.316 |
| Slc25a<br>42 | Down | 0.0155    | 1.477 | 1.107 | 1.235 | 0.879 | 0.879 | 0.726 |
| Srgap2       | Down | 0.0201    | 1.102 | 1.145 | 1.493 | 0.765 | 0.824 | 0.902 |
| Tspan3<br>1  | Up   | 0.00516   | 0.639 | 0.785 | 0.625 | 1.419 | 1.392 | 1.076 |
| Mrpl11       | Down | 0.0369    | 1.255 | 0.976 | 2.3   | 0.692 | 0.628 | 0.597 |
| Ndufa1<br>1  | Down | 0.00658   | 1.346 | 1.081 | 1.393 | 0.862 | 0.812 | 0.79  |
| Slirp        | Down | 0.0104    | 1.566 | 1.151 | 1.251 | 0.681 | 0.873 | 0.77  |
| Isca1        | Up   | 0.0119    | 0.768 | 0.676 | 0.678 | 1.041 | 1.171 | 1.569 |
| Slc25a<br>19 | Down | 0.000876  | 1.289 | 1.24  | 1.344 | 0.786 | 0.87  | 0.735 |
| Xrn2         | Down | 0.00188   | 1.352 | 1.132 | 1.313 | 0.825 | 0.785 | 0.847 |

|         |      |          |       |       |       |       |       |       |
|---------|------|----------|-------|-------|-------|-------|-------|-------|
| Cend1   | Up   | 2.13E-07 | 0.777 | 0.774 | 0.788 | 1.191 | 1.175 | 1.179 |
| Xpnpep3 | Down | 0.00896  | 1.105 | 1.26  | 1.555 | 0.841 | 0.757 | 0.751 |
| Ampd3   | Up   | 0.0104   | 0.857 | 0.776 | 0.717 | 1.13  | 1.084 | 1.395 |
| Numbl   | Up   | 0.0176   | 0.615 | 0.93  | 0.752 | 1.252 | 1.254 | 1.151 |
| Tgfr3   | Up   | 0.0119   | 0.857 | 0.845 | 0.636 | 1.193 | 1.152 | 1.278 |
| Ppt1    | Up   | 0.0002   | 0.591 | 0.48  | 0.533 | 1.552 | 1.367 | 1.346 |
| Thy1    | Up   | 0.0106   | 0.887 | 0.786 | 0.696 | 1.231 | 1.287 | 1.06  |
| Ly6a    | Up   | 0.00254  | 0.603 | 0.724 | 0.807 | 1.316 | 1.239 | 1.251 |
| Apoa2   | Up   | 0.0163   | 0.881 | 0.786 | 0.695 | 1.063 | 1.145 | 1.388 |
| Svs4    | Down | 0.00414  | 1.846 | 1.117 | 2.161 | 0.531 | 0.488 | 0.426 |
| Ighv3-6 | Down | 0.0373   | 1.168 | 1.554 | 1.006 | 0.761 | 0.83  | 0.855 |
| Hsd3b1  | Up   | 0.00778  | 0.672 | 0.587 | 0.85  | 1.323 | 1.396 | 1.141 |
| Epha3   | Up   | 0.00844  | 0.668 | 0.907 | 0.686 | 1.305 | 1.217 | 1.167 |
| Scarf2  | Up   | 0.0258   | 0.492 | 0.901 | 0.686 | 1.421 | 1.262 | 1.156 |
| Tsc22d1 | Up   | 0.00648  | 0.698 | 0.856 | 0.74  | 1.172 | 1.387 | 1.112 |
| Ube2d2  | Down | 0.0053   | 1.149 | 1.391 | 1.772 | 0.629 | 0.742 | 0.651 |
| Hfe     | Up   | 0.000756 | 0.652 | 0.691 | 0.568 | 1.186 | 1.391 | 1.393 |
| C1qa    | Up   | 0.00222  | 0.582 | 0.665 | 0.431 | 1.492 | 1.352 | 1.334 |
| Folr2   | Up   | 0.00732  | 0.747 | 0.645 | 0.766 | 1.469 | 1.05  | 1.285 |
| Eml4    | Down | 0.0393   | 1.305 | 0.972 | 1.493 | 0.788 | 0.884 | 0.831 |
| Cox7a21 | Down | 0.0185   | 1.418 | 1.027 | 2.098 | 0.708 | 0.632 | 0.566 |
| Nop58   | Down | 0.0113   | 1.546 | 1.059 | 1.461 | 0.702 | 0.714 | 0.837 |
| Sepsecs | Down | 0.0157   | 1.454 | 1.024 | 1.936 | 0.713 | 0.666 | 0.624 |
| Usmg5   | Down | 0.0092   | 1.428 | 1.148 | 1.669 | 0.628 | 0.616 | 0.848 |
| Nucks1  | Down | 0.0114   | 2.221 | 1.351 | 1.431 | 0.689 | 0.517 | 0.321 |
| Lyve1   | Up   | 0.0248   | 0.771 | 0.723 | 0.56  | 1.193 | 0.999 | 1.636 |
| Armcx3  | Up   | 0.0154   | 0.58  | 0.818 | 0.481 | 1.346 | 1.585 | 1.085 |
| Pdxk    | Up   | 0.00602  | 0.86  | 0.772 | 0.696 | 1.077 | 1.268 | 1.291 |
| Mustn1  | Up   | 0.0253   | 0.569 | 0.893 | 0.531 | 1.337 | 1.537 | 1.044 |
| Atg3    | Down | 0.00822  | 1.31  | 1.116 | 1.505 | 0.823 | 0.842 | 0.704 |
| Cuta    | Up   | 0.0253   | 0.659 | 0.831 | 0.662 | 1.213 | 1.513 | 0.962 |
| Marc1   | Down | 0.009    | 1.149 | 1.421 | 2.246 | 0.559 | 0.628 | 0.448 |
| Hhatl   | Down | 0.00906  | 1.454 | 1.097 | 2.689 | 0.483 | 0.39  | 0.47  |
| Fam213b | Down | 0.0193   | 1.237 | 1.094 | 1.88  | 0.723 | 0.642 | 0.772 |
| Rai14   | Up   | 0.0241   | 0.774 | 0.914 | 0.662 | 1.186 | 1.044 | 1.364 |
| Dkc1    | Down | 0.0334   | 1.501 | 0.977 | 1.522 | 0.686 | 0.719 | 0.904 |
| Cpb2    | Up   | 0.0054   | 0.386 | 0.636 | 0.326 | 1.203 | 1.622 | 1.58  |
| P2rx4   | Up   | 0.000662 | 0.581 | 0.502 | 0.656 | 1.399 | 1.257 | 1.478 |

|              |      |           |       |       |       |       |       |       |
|--------------|------|-----------|-------|-------|-------|-------|-------|-------|
| Hspb8        | Down | 0.0378    | 1.038 | 1.156 | 1.895 | 0.725 | 0.707 | 0.789 |
| Add2         | Down | 0.00624   | 1.375 | 1.14  | 1.259 | 0.835 | 0.734 | 0.901 |
| Ggps1        | Up   | 0.00566   | 0.587 | 0.794 | 0.738 | 1.167 | 1.422 | 1.217 |
| Cpq          | Up   | 0.00306   | 0.848 | 0.818 | 0.686 | 1.222 | 1.243 | 1.164 |
| Gfpt2        | Up   | 0.0129    | 0.669 | 0.719 | 0.535 | 1.382 | 0.987 | 1.577 |
| Asna1        | Up   | 0.000725  | 0.686 | 0.814 | 0.733 | 1.186 | 1.28  | 1.246 |
| Tcap         | Down | 0.00452   | 1.857 | 0.979 | 3.412 | 0.25  | 0.144 | 0.191 |
| Igf2bp1      | Up   | 0.00148   | 0.741 | 0.592 | 0.541 | 1.305 | 1.284 | 1.427 |
| Lamtor<br>3  | Up   | 0.0014    | 0.772 | 0.73  | 0.77  | 1.265 | 1.346 | 1.102 |
| Mtnd4        | Down | 0.00258   | 1.445 | 1.226 | 1.239 | 0.805 | 0.851 | 0.712 |
| Sbk2         | Down | 0.00262   | 1.477 | 1.246 | 2.128 | 0.546 | 0.514 | 0.564 |
| Agt          | Up   | 0.000479  | 0.839 | 0.757 | 0.781 | 1.168 | 1.173 | 1.265 |
| C1qb         | Up   | 0.0000203 | 0.59  | 0.606 | 0.583 | 1.434 | 1.278 | 1.385 |
| Acp2         | Up   | 0.0142    | 0.884 | 0.709 | 0.612 | 1.298 | 1.395 | 1.082 |
| Plaur        | Up   | 0.00162   | 0.624 | 0.665 | 0.655 | 1.55  | 1.313 | 1.128 |
| Foxk1        | Down | 0.01      | 1.518 | 1.051 | 1.553 | 0.71  | 0.709 | 0.795 |
| Cox6a2       | Down | 0.0157    | 1.513 | 0.94  | 3.064 | 0.476 | 0.34  | 0.344 |
| Atp5j2       | Down | 0.0113    | 1.285 | 1.102 | 1.573 | 0.785 | 0.698 | 0.848 |
| Atp5f1<br>e  | Down | 0.043     | 1.178 | 1.015 | 1.734 | 0.786 | 0.737 | 0.845 |
| Npy          | Up   | 0.0398    | 0.776 | 0.851 | 0.666 | 1.316 | 0.92  | 1.411 |
| Pcmd1        | Up   | 0.0108    | 0.789 | 0.789 | 0.561 | 1.135 | 1.248 | 1.391 |
| Seleno<br>p  | Up   | 0.00122   | 0.505 | 0.593 | 0.412 | 1.263 | 1.392 | 1.624 |
| Irf3         | Up   | 0.00912   | 0.767 | 0.846 | 0.75  | 1.271 | 1.338 | 1.024 |
| Fbp2         | Down | 0.0315    | 0.926 | 1.523 | 1.744 | 0.796 | 0.657 | 0.648 |
| Mcm6         | Down | 0.0226    | 1.505 | 1.038 | 1.281 | 0.79  | 0.747 | 0.906 |
| Eepd1        | Down | 0.00526   | 1.695 | 1.14  | 1.346 | 0.722 | 0.747 | 0.698 |
| Fam92<br>b   | Down | 0.0402    | 1.047 | 1.398 | 1.4   | 0.808 | 0.789 | 0.787 |
| Pik3c2<br>a  | Up   | 0.000659  | 0.683 | 0.802 | 0.734 | 1.292 | 1.266 | 1.177 |
| Cd55         | Up   | 0.0238    | 0.784 | 0.464 | 0.392 | 1.642 | 0.968 | 1.606 |
| Cbx5         | Down | 0.00876   | 1.271 | 1.336 | 1.219 | 0.673 | 0.775 | 0.94  |
| Ltbp3        | Up   | 0.0291    | 0.599 | 0.932 | 0.705 | 1.443 | 1.209 | 1.069 |
| Parpbp       | Up   | 0.0018    | 0.409 | 0.408 | 0.328 | 1.214 | 1.276 | 2.058 |
| Adamts<br>14 | Up   | 0.0013    | 0.611 | 0.721 | 0.613 | 1.496 | 1.3   | 1.177 |
| F12          | Up   | 0.000756  | 0.449 | 0.593 | 0.419 | 1.329 | 1.412 | 1.584 |
| Htatsf1      | Down | 0.0079    | 1.295 | 1.101 | 1.477 | 0.801 | 0.736 | 0.861 |
| Slc36a<br>2  | Down | 0.016     | 1.332 | 1.051 | 1.737 | 0.718 | 0.792 | 0.713 |

|              |      |          |       |       |       |       |       |       |
|--------------|------|----------|-------|-------|-------|-------|-------|-------|
| Marf1        | Down | 0.000596 | 1.315 | 1.359 | 1.481 | 0.76  | 0.758 | 0.641 |
| Tmem2<br>14  | Down | 0.000404 | 1.992 | 1.382 | 1.797 | 0.41  | 0.448 | 0.498 |
| Prr33        | Down | 0.0308   | 1.578 | 1.034 | 1.618 | 0.794 | 0.839 | 0.53  |
| C1rb         | Up   | 0.00994  | 0.879 | 0.747 | 0.659 | 1.34  | 1.282 | 1.084 |
| Mamdc<br>2   | Up   | 0.000884 | 0.53  | 0.629 | 0.633 | 1.489 | 1.439 | 1.179 |
| Btd          | Up   | 0.0169   | 0.944 | 0.673 | 0.721 | 1.179 | 1.35  | 1.134 |
| Spp2         | Up   | 0.00014  | 0.437 | 0.475 | 0.355 | 1.486 | 1.573 | 1.457 |
| Syng3        | Up   | 0.0205   | 0.813 | 0.723 | 0.652 | 1.052 | 1.108 | 1.564 |
| Nudt4        | Up   | 0.0205   | 0.678 | 0.898 | 0.739 | 1.108 | 1.441 | 1.098 |
| Myoz3        | Down | 0.0295   | 1.103 | 1.151 | 2.185 | 0.681 | 0.714 | 0.57  |
| Camk1        | Up   | 0.0272   | 0.645 | 0.961 | 0.725 | 1.159 | 1.356 | 1.111 |
| Slc41a<br>3  | Down | 0.00962  | 1.302 | 1.071 | 1.445 | 0.842 | 0.764 | 0.845 |
| Nop2         | Up   | 0.0071   | 0.852 | 0.58  | 0.581 | 1.204 | 1.337 | 1.37  |
| Rbm10        | Down | 0.0213   | 1.82  | 1.159 | 1.84  | 0.574 | 0.564 | 0.533 |
| Mrps18<br>b  | Down | 0.0439   | 1.302 | 0.973 | 1.518 | 0.902 | 0.755 | 0.832 |
| Atp5l        | Down | 0.023    | 1.184 | 1.087 | 1.821 | 0.723 | 0.722 | 0.785 |
| Uqcr11       | Down | 0.0326   | 1.132 | 1.019 | 3.212 | 0.569 | 0.414 | 0.293 |
| Ptms         | Up   | 0.0213   | 0.667 | 0.833 | 0.615 | 1.184 | 1.607 | 1.034 |
| Tmem1<br>26b | Down | 0.0065   | 1.456 | 1.125 | 1.229 | 0.756 | 0.84  | 0.85  |
| Zfyve1<br>9  | Down | 0.0318   | 1.54  | 1.126 | 2.136 | 0.573 | 0.545 | 0.564 |
| Hmgn3        | Up   | 0.0122   | 0.66  | 0.864 | 0.556 | 1.188 | 1.446 | 1.197 |
| Cd302        | Up   | 0.000401 | 0.648 | 0.693 | 0.655 | 1.319 | 1.437 | 1.175 |
| Ubxn8        | Down | 0.00654  | 1.524 | 1.292 | 1.403 | 0.815 | 0.77  | 0.546 |
| Ctsf         | Up   | 0.0021   | 0.723 | 0.774 | 0.644 | 1.271 | 1.401 | 1.135 |
| Adam2<br>4   | Down | 0.00166  | 1.348 | 1.496 | 1.942 | 0.622 | 0.57  | 0.46  |
| Ntn3         | Up   | 0.0488   | 0.626 | 0.864 | 0.753 | 1.333 | 1.498 | 0.908 |
| Nfkb2        | Down | 0.00332  | 1.382 | 1.238 | 1.308 | 0.832 | 0.854 | 0.672 |
| Camta1       | Up   | 0.000562 | 0.764 | 0.632 | 0.695 | 1.336 | 1.309 | 1.217 |
| Ttll8        | Up   | 0.00706  | 0.668 | 0.539 | 0.58  | 1.065 | 1.246 | 1.738 |
| Armc4        | Up   | 0.00862  | 0.461 | 0.376 | 0.26  | 1.03  | 1.262 | 2.269 |
| C3ar1        | Up   | 0.0319   | 0.625 | 0.659 | 0.875 | 1.264 | 1.297 | 1.236 |
| Pkig         | Up   | 0.0029   | 0.682 | 0.657 | 0.763 | 1.368 | 1.407 | 1.088 |
| mt-Co3       | Down | 0.0398   | 1.06  | 1.91  | 1.089 | 0.626 | 0.769 | 0.741 |
| Mt1          | Up   | 0.000716 | 0.253 | 0.339 | 0.247 | 1.156 | 1.866 | 1.802 |
| Mtnd4l       | Down | 0.0422   | 1.846 | 0.99  | 2.222 | 0.488 | 0.525 | 0.492 |
| Mycn         | Down | 0.00582  | 3.002 | 1.101 | 1.555 | 0.34  | 0.384 | 0.314 |

|             |      |          |       |       |       |       |       |       |
|-------------|------|----------|-------|-------|-------|-------|-------|-------|
| Mdk         | Up   | 0.0054   | 0.47  | 0.739 | 0.451 | 1.245 | 1.346 | 1.555 |
| Crp         | Up   | 0.00106  | 0.735 | 0.735 | 0.739 | 1.228 | 1.292 | 1.227 |
| Myd88       | Up   | 0.0355   | 0.799 | 0.81  | 0.756 | 1.01  | 1.06  | 1.504 |
| Msr1        | Up   | 0.0105   | 0.83  | 0.558 | 0.585 | 1.408 | 1.089 | 1.449 |
| C5ar1       | Up   | 0.00228  | 0.712 | 0.687 | 0.542 | 1.304 | 1.191 | 1.451 |
| Evc         | Up   | 0.00924  | 0.596 | 0.867 | 0.633 | 1.144 | 1.27  | 1.382 |
| Tbx4        | Down | 0.0025   | 1.733 | 1.182 | 2.8   | 0.315 | 0.296 | 0.352 |
| Gnrhr       | Up   | 0.00368  | 0.697 | 0.814 | 0.609 | 1.154 | 1.359 | 1.284 |
| Clqc        | Up   | 0.000464 | 0.681 | 0.671 | 0.548 | 1.342 | 1.297 | 1.353 |
| Dennd1<br>b | Down | 0.00564  | 2.172 | 1.277 | 3.316 | 0.119 | 0.01  | 0.017 |
| Hgsnat      | Up   | 0.00208  | 0.852 | 0.757 | 0.713 | 1.304 | 1.147 | 1.209 |
| Jcad        | Down | 0.000375 | 1.374 | 1.433 | 1.411 | 0.668 | 0.633 | 0.78  |
| Penx2       | Down | 0.0121   | 2.013 | 1.269 | 2.399 | 0.336 | 0.334 | 0.314 |
| Vps41       | Down | 0.00156  | 1.528 | 1.264 | 1.527 | 0.78  | 0.604 | 0.66  |
| Syp         | Up   | 0.00258  | 0.717 | 0.808 | 0.666 | 1.121 | 1.25  | 1.361 |
| Ccdc66      | Down | 0.00268  | 1.642 | 1.21  | 2.649 | 0.347 | 0.38  | 0.398 |
| Tlr13       | Down | 0.043    | 1.486 | 0.994 | 1.613 | 0.917 | 0.774 | 0.584 |
| Kirrel1     | Up   | 0.00706  | 0.592 | 0.864 | 0.659 | 1.23  | 1.356 | 1.216 |
| Fbll1       | Down | 0.0155   | 1.562 | 1.039 | 1.415 | 0.757 | 0.695 | 0.845 |
| Chtf18      | Up   | 0.00524  | 0.459 | 0.355 | 0.327 | 1.521 | 1.571 | 1.535 |
| Dhx32       | Down | 0.0379   | 1.545 | 1.197 | 1.139 | 1.008 | 0.747 | 0.657 |
| Chpt1       | Down | 0.00566  | 1.204 | 1.273 | 1.45  | 0.727 | 0.694 | 0.902 |
| Zswim<br>4  | Down | 0.000303 | 2.372 | 1.559 | 1.685 | 0.312 | 0.3   | 0.378 |
| Phtf2       | Up   | 0.00292  | 0.35  | 0.322 | 0.202 | 1.133 | 1.419 | 2.204 |
| Smoc2       | Up   | 0.0273   | 0.409 | 0.775 | 0.765 | 1.252 | 1.227 | 1.444 |
| Ttc27       | Down | 0.00466  | 2.406 | 0.998 | 2.488 | 0.357 | 0.23  | 0.278 |
| Cyp2d2<br>6 | Up   | 0.000823 | 0.724 | 0.681 | 0.682 | 1.217 | 1.172 | 1.441 |
| Tceal3      | Up   | 0.031    | 0.442 | 0.79  | 0.642 | 1.443 | 1.642 | 0.954 |
| Sumf1       | Up   | 0.00658  | 0.814 | 0.668 | 0.882 | 1.222 | 1.245 | 1.173 |
| Tspan8      | Down | 0.00406  | 1.102 | 1.375 | 1.366 | 0.799 | 0.746 | 0.837 |
| Fitm1       | Down | 0.0363   | 1.428 | 1.052 | 3.402 | 0.28  | 0.263 | 0.306 |
| Plpp7       | Down | 0.00214  | 1.415 | 1.166 | 1.444 | 0.826 | 0.724 | 0.734 |
| Ddx27       | Down | 0.0317   | 1.527 | 1.023 | 1.224 | 0.826 | 0.764 | 0.899 |
| Chchd5      | Up   | 0.00424  | 0.831 | 0.6   | 0.672 | 1.271 | 1.192 | 1.375 |
| Dbn1d<br>2  | Up   | 0.0116   | 0.509 | 0.759 | 0.629 | 1.369 | 1.599 | 1.046 |
| Sycp2       | Up   | 0.0181   | 0.672 | 0.908 | 0.701 | 1.049 | 1.222 | 1.37  |
| Rrp7a       | Up   | 0.0202   | 0.497 | 0.852 | 0.523 | 1.622 | 1.335 | 1.071 |
| Naa38       | Down | 0.00198  | 1.761 | 1.126 | 3.442 | 0.197 | 0.139 | 0.162 |
| Etnk1       | Up   | 0.0444   | 0.745 | 0.796 | 0.342 | 1.156 | 1.452 | 1.371 |

|             |    |         |       |       |       |       |       |       |
|-------------|----|---------|-------|-------|-------|-------|-------|-------|
| Slco2a<br>1 | Up | 0.0342  | 0.687 | 0.781 | 0.792 | 1.172 | 0.95  | 1.541 |
| Sfrp4       | Up | 0.00202 | 0.677 | 0.765 | 0.746 | 1.382 | 1.105 | 1.273 |

Proteomic analysis of differentially expressed proteins.



**Table S5**

| <b>Human</b>   |                         |                          |
|----------------|-------------------------|--------------------------|
| <b>Gene</b>    | <b>Forward primer</b>   | <b>Reverse primer</b>    |
| IFN $\alpha$   | GCCTCGCCCTTTGCTTTACT    | CTGTGGGTCTCAGGGAGATCA    |
| IFN $\beta$    | ATGACCAACAAGTGTCTCCTCC  | GGAATCCAAGCAAGTTGTAGCTC  |
| IRF7           | GCTGGACGTGACCATCATGTA   | GGCCGTATAGGAACGTGC       |
| MX1            | AGCGGGATCGTGACCAGAT     | TGACCTTGCCTCTCCACTTATC   |
| cGAS           | ACATGGCGGCTATCCTTCTCT   | GGGTCTGGGTACATACGTGAAA   |
| STING          | CCAGAGCACACTCTCCGGTA    | CGCATTTGGGAGGGAGTAGTA    |
| IRF3           | AGAGGCTCGTGATGGTCAAG    | AGGTCCACAGTATTCTCCAGG    |
| IFNAR1         | AACAGGAGCGATGAGTCTGTC   | TGCGAAATGGTGTAATGAGTCA   |
| STAT1          | CGGCTGAATTTCCGGCACCT    | CAGTAACGATGAGAGGACCCT    |
| $\alpha$ -SMA  | GTGTTGCCCTGAAGAGCAT     | GCTGGGACATTGAAAGTCTCA    |
| CNN1           | GTCAACCCAAAATTGGCACCA   | ACCTTGTTTCCTTTCGTCTTCG   |
| TAGLN          | AGTGCAGTCCAAAATCGAGAAG  | CTTGCTCAGAATCACGCCAT     |
| MYH11          | CATCTACTCGGAGAAGATCGTCG | CGCCTGTGCATAGAATGGACT    |
| p53            | GAGGTTGGCTCTGACTGTACC   | TCCGTCCCAGTAGATTACCAC    |
| p16            | GATCCAGGTGGGTAGAAGGTC   | CCCCTGCAAACCTTCGTCTCT    |
| $\beta$ -actin | CATGTACGTTGCTATCCAGGC   | CTCCTTAATGTCACGCACGAT    |
| <b>Mouse</b>   |                         |                          |
| <b>Gene</b>    | <b>Forward primer</b>   | <b>Reverse primer</b>    |
| IFN $\alpha$   | ATGGCTAGGCTCTGTGCTTTCT  | AGGGCTCTCCAGAGTTCTGCTCTG |
| IFN $\beta$    | TGGGTGGAATGAGACTATTGTTG | CTCCCACGTCAATCTTTCCTC    |
| IRF7           | GAGACTGGCTATTGGGGGAG    | GACCGAAATGCTTCCAGGG      |
| MX1            | GTTTCCGAAGTGGACATCGCA   | CTGCACAGGTTGTTCTCAGC     |
| $\alpha$ -SMA  | GTCCCAGACATCAGGGAGTAA   | TCCGATACTTCAGCGTCAGGA    |
| CNN1           | TCTGCACATTTTAACCGAGGTC  | GCCAGCTTGTTCTTTACTTCAGC  |
| TAGLN          | CAACAAGGGTCCATCCTACGG   | ATCTGGGCGGCCTACATCA      |
| MYH11          | AAGCTGCGGCTAGAGGTCA     | CCCTCCCTTTGATGGCTGAG     |
| $\beta$ -actin | CGTTGACATCCGTAAAGACC    | AACAGTCCGCCTAGAAGCAC     |

Primer sequences for mRNA expression analysis.

**Table S6**

| <b>mtDNA</b>   |                        |                              |
|----------------|------------------------|------------------------------|
| <b>Gene</b>    | <b>Forward primer</b>  | <b>Reverse primer</b>        |
| ND1            | CCCTAAAACCCGCCACATCT   | GAGCGATGGTGAGAGCTAAGGT       |
| ND2            | ACCATCTTTGCAGGCACACT   | GCTTCTGTGGAACGAGGGTT         |
| ND4            | TTCCTCCGACCCCCTAACAA   | GATAAGTGGCGTTGGCTTGC         |
| ND5            | TTCATCCCTGTAGCATTGTTCG | GTTGGAATAGGTTGTTAGCGGTA      |
| <b>nDNA</b>    |                        |                              |
| <b>Gene</b>    | <b>Forward primer</b>  | <b>Reverse primer</b>        |
| B2M            | CCAGCAGAGAATGGAAAGTCAA | TCTCTCTCCATTCTTCAGTAAGTCAACT |
| $\beta$ -actin | GCACCCAGCACAATGAAGAT   | CAATGATCTGAGGAGGGAAGGG       |
| POLG           | TCCTGGAACAGTTGTGCTTTC  | CCATCTACTCAGGACGGAGTTC       |
| GAPDH          | CTGGGCTACACTGAGCACC    | AAGTGGTCGTTGAGGGCAATG        |

Primer sequences for mtDNA and nDNA analysis.

**Table S7**

| <b>Human</b>     |                       |                       |
|------------------|-----------------------|-----------------------|
| <b>Gene</b>      | <b>Sense</b>          | <b>Antisense</b>      |
| IFNAR1           | CCUACUUCCUCCAGUCUUUTT | AAAGACUGGAGGAAGUAGGTT |
| STAT1            | GCGUAAUCUUCAGGAUAAUTT | AUUAUCCUGAAGAUUACGCTT |
| cGAS             | CCAACACUCGUGCAUAUUATT | UAAUAUGCACGAGUGUUGGTT |
| STING            | GCAUCAAGGAUCGGGUUUATT | UAAACCCGAUCCUUGAUGCTT |
| Negative control | UCCUCCGAACGUGUCACGUTT | ACGUGACACGUUCGGAGAATT |

siRNA sequences used for RNA interference.
